1 **Tumor evolution of glioma intrinsic gene expression subtype associates with**  
2 **immunological changes in the microenvironment**

3 Qianghu Wang<sup>1, 2, 3\*</sup>, Xin Hu<sup>1, 8\*</sup>, Baoli Hu<sup>4</sup>, Florian Muller<sup>1, 5</sup>, Hoon Kim<sup>1</sup>, Massimo  
4 Squatrito<sup>9</sup>, Tom Mikkelsen<sup>10</sup>, Lisa Scarpace<sup>10</sup>, Floris Barthel<sup>11</sup>, Yu-Hsi Lin<sup>5</sup>, Nikunj  
5 Satani<sup>5</sup>, Emmanuel Martinez-Ledesma<sup>1</sup>, Edward Chang<sup>1</sup>, Adriana Olar<sup>6</sup>, Guocan Wang<sup>4</sup>,  
6 Ana C. deCarvalho<sup>10</sup>, Eskil Eskilsson<sup>1</sup>, Siyuan Zheng<sup>1</sup>, Amy B. Heimberger<sup>7</sup>, Erik P.  
7 Sulman<sup>2†</sup>, Do-Hyun Nam<sup>12, 13, 14†</sup>, Roel G.W. Verhaak<sup>1, 3†</sup>

8 <sup>1</sup>Department of Genomic Medicine, <sup>2</sup>Department of Radiation Oncology, <sup>3</sup>Department of  
9 Bioinformatics and Computational Biology, <sup>4</sup>Department of Cancer Biology, <sup>5</sup>Department of  
10 Cancer Systems Imaging, <sup>6</sup>Department of Pathology, <sup>7</sup>Department of Neurosurgery, The  
11 University of Texas MD Anderson Cancer Center, Houston, TX 77030, USA; <sup>8</sup>University of  
12 Texas-Houston Graduate School in Biomedical Sciences, Houston, TX 77030, USA; <sup>9</sup>Cancer  
13 Cell Biology Programme, Seve Ballesteros Foundation Brain Tumor Group, Centro Nacional de  
14 Investigaciones Oncológicas, CNIO, 28029 Madrid, Spain; <sup>10</sup>Departments of Neurology and  
15 Neurosurgery, Henry Ford Hospital, Detroit, MI 48202, USA; <sup>11</sup>Oncology Graduate School  
16 Amsterdam, VU University Medical Center, 1081 HV Amsterdam, The Netherlands; <sup>12</sup>Institute  
17 for Refractory Cancer Research, Samsung Medical Center, Seoul 06351, Korea; <sup>13</sup>Department  
18 of Health Sciences and Technology, Samsung Advanced Institute for Health Sciences and  
19 Technology, Sungkyunkwan University, Seoul 06351, Korea; <sup>14</sup>Department of Neurosurgery  
20 Samsung Medical Center, Sungkyunkwan University School of Medicine, Seoul, 135-710, Korea.

21

22 \* These authors contributed equally

23 †Co-senior authors

24

25 Correspondence: [epsulman@mdanderson.org](mailto:epsulman@mdanderson.org), [nsnam@skku.edu](mailto:nsnam@skku.edu),  
26 [rverhaak@mdanderson.org](mailto:rverhaak@mdanderson.org)

27

28 **Keywords:** glioblastoma, disease recurrence, mesenchymal subtype, proneural to  
29 mesenchymal transition, gene expression profiling, tumor microenvironment,  
30 macrophages/microglia, immune cells.

## 31 **Summary**

32 We leveraged IDH wild type glioblastomas and derivative neurospheres to define tumor-  
33 intrinsic transcription phenotypes. Transcriptomic multiplicity correlated with increased  
34 intratumoral heterogeneity and tumor microenvironment presence. In silico cell sorting  
35 demonstrated that M2 macrophages/microglia are the most frequent type of immune  
36 cells in the glioma microenvironment, followed by CD4 T lymphocytes and neutrophils.  
37 Hypermethylation associated with CD8+ T cell enrichment. Longitudinal transcriptome  
38 analysis of 124 pairs of primary and recurrent gliomas showed expression subtype is  
39 retained in 53% of cases with no proneural to mesenchymal transition being apparent.  
40 Inference of the tumor microenvironment through gene signatures revealed a decrease  
41 in invading monocytes but a subtype dependent increase in M2 macrophages/microglia  
42 cells after disease recurrence. All expression datasets are accessible through  
43 <http://recur.bioinfo.cnio.es/>.

## 44 **Significance**

45 IDH wild type glioblastoma expression phenotypes have been related to tumor  
46 characteristics including genomic abnormalities and treatment response. We explored  
47 the intratumoral transcriptomic landscape, including a definition of tumor-intrinsic gene  
48 expression subtypes and how they relate to the different cellular components of the  
49 tumor immune environment. Comparison of matching primary and recurrent gliomas  
50 provided insights into the treatment-induced phenotypic tumor evolution. Proneural to  
51 mesenchymal transitions have long been suspected but were not apparent, while  
52 intratumoral heterogeneity was a predictor of subtype transition upon recurrence.  
53 Characterizing the evolving glioblastoma transcriptome in tumor microenvironment aids

54 in designing more effective immunotherapy trials. Our study provides a comprehensive  
55 transcriptional and cellular landscape of IDH wild type GBM during treatment modulated  
56 tumor evolution.

57

## 58 **Highlights**

- 59 • Next generation GBM-intrinsic transcriptional subtypes: proneural, classical,  
60 mesenchymal
- 61 • M2 macrophages, CD4+ T-lymphocytes and neutrophils dominate glioblastoma  
62 microenvironment
- 63 • Sensitivity to radiotherapy may associate with M2 macrophage presence
- 64 • CD8+ T cells are enriched in hypermutated GBMs at diagnosis and recurrence

## 65 INTRODUCTION

66 The intrinsic capacity of glioblastoma (GBM) tumor cells to infiltrate normal brain  
67 impedes surgical eradication and predictably results in high rates of early recurrence.  
68 To better understand determinants of GBM tumor evolution and treatment resistance,  
69 The Cancer Genome Atlas Consortium (TCGA) performed high dimensional profiling  
70 and molecular classification of nearly 600 GBM tumors (Brennan et al., 2013; Cancer  
71 Genome Atlas Research, 2008; Ceccarelli et al., 2016; Noushmehr et al., 2010;  
72 Verhaak et al., 2010b). In addition to revealing common mutations in genes such as  
73 *TP53*, *EGFR*, *IDH1*, and *PTEN*, as well as the frequent and concurrent presence of  
74 abnormalities in the p53, RB and receptor tyrosine kinase pathways. Unsupervised  
75 transcriptome analysis identified four clusters, referred to as classical, mesenchymal,  
76 neural and proneural, that were tightly associated with genomic abnormalities(Verhaak  
77 et al., 2010a). The proneural and the mesenchymal expression subtypes have been  
78 most consistently described in literature with proneural relating to a more favorable  
79 outcome and mesenchymal to unfavorable survival (Huse et al., 2011; Phillips et al.,  
80 2006; Zheng et al., 2012), but these findings were affected by the relatively favorable  
81 outcome of IDH-mutant glioblastoma which are consistently classified as proneural  
82 (Noushmehr et al., 2010; Verhaak et al., 2010a). Proneural to mesenchymal switching  
83 upon disease recurrence has been described as a source for treatment resistance in  
84 GBM relapse (Bao et al., 2006; Bhat et al., 2013; Ozawa et al., 2014; Phillips et al.,  
85 2006), but the relevance of this phenomenon in glioma progress remains ambiguous.

86 GBM tumor cells along with the tumor microenvironment create a complex milieu  
87 that ultimately promotes tumor cell plasticity and disease progression (Olar and Aldape,

88 2014). The presence of tumor-associated stroma results in a mesenchymal tumor gene  
89 signature and poor prognosis in colon cancers (Isella et al., 2015). Furthermore, the  
90 association between a mesenchymal gene expression signature and reduced tumor  
91 purity has been identified as a common theme across cancer (Martinez et al., 2015;  
92 Yoshihara et al., 2013). Tumor-associated macrophages/microglia in GBM have been  
93 proposed as regulators of proneural-to-mesenchymal transition through NF- $\kappa$ B  
94 activation (Bhat et al., 2013) and may provide growth factor mediated proliferative  
95 signals, which could be therapeutically targeted (Patel et al., 2014; Pyonteck et al.,  
96 2013; Yan et al., 2015).

97 Here, we explored the properties of the microenvironment in different GBM gene  
98 expression subtypes and characterized the transition between molecular subtypes  
99 before and after therapeutic intervention. In doing so, we improved the robustness of  
100 gene expression subtype classification through revised gene signatures and proposed  
101 analytical methodology. Our results suggested that the tumor microenvironment  
102 interferes with expression based classification of GBM, both at the primary disease  
103 stage as well as at disease recurrence, and suggest a role for the  
104 macrophage/microglia in treatment response.

105 **RESULTS**

106 ***Harnessing glioma sphere-forming cells identifies GBM specific intertumoral***  
107 ***transcriptional heterogeneity***

108 We set out to elucidate the tumor-intrinsic and tumor microenvironment independent  
109 transcriptional heterogeneity of GBMs. We performed a pairwise gene expression  
110 comparison of independent set of GBMs and the derivative glioma sphere-forming cells  
111 (GSCs) (n = 37) (Galli et al., 2004). In total, 5,334 genes were found to be significantly  
112 higher expressed in parental GBMs relative to derived GSCs that could be attributed by  
113 the tumor associated GBM microenvironment (**Figure 1A**). To focus the analysis on the  
114 tumor-intrinsic transcriptome, these genes were filtered from further analysis. GBMs  
115 with IDH mutations have distinct biological properties and favorable clinical outcomes  
116 compared to IDH wild-type GBMs (Brennan et al., 2013; Cancer Genome Atlas  
117 Research et al., 2015; Ceccarelli et al., 2016; Noushmehr et al., 2010). Using the  
118 filtered gene set, we performed consensus non-negative matrix factorization clustering  
119 to identify three distinct subgroups amongst 369 IDH wild type GBMs (**Figure 1B**;  
120 **Figure 1C**). When comparing the clustering result with the previously defined proneural  
121 (PN), neural (NE), classical (CL) and mesenchymal (MES) classification (Brennan et al.,  
122 2013; Verhaak et al., 2010b), three subgroups were strongly enriched for CL, MES and  
123 PN GBMs, respectively (**Figure S1**). Consequently, we labeled the groups as CL, MES  
124 and PN. None of the three subgroups was enriched for the NE class, suggesting its  
125 neural phenotype is non-tumor specific. The NE group has previously been related to  
126 the tumor margin where normal neural tissue is more likely to be present (Gill et al.,  
127 2014; Sturm et al., 2012) and such contamination might explain why the neural subtype

128 was the only subtype to lack characteristic gene abnormalities (Brennan et al., 2013;  
129 Verhaak et al., 2013). To be able to classify external GBM samples, we implemented a  
130 single sample gene set enrichment analysis (ssGSEA) based equivalent distribution  
131 resampling classification strategy using 70-gene signatures for each subgroup (**Table**  
132 **S1**)(**Figure 1D**), to assign each sample three empirical classification p-values by which  
133 we determined the significantly activated subtype(s) in the samples. We prepared an R-  
134 library to facilitate others to evaluate our approach (Supplementary File 1). Using this  
135 method we found that the stability of cluster assignments of 144 TCGA GBM samples  
136 profiled using both RNA sequencing and Affymetrix U133A microarrays was 95%  
137 concordance (**Figure S2, Table S2**). This was an improvement over the 77% subtype  
138 concordance determined using previously reported methods (Verhaak et al., 2010b).  
139 We evaluated the distribution of somatic variants across all the three molecular  
140 subtypes (**Figure 1E**)(**Figure S3**) and confirmed the strong associations between  
141 subtypes and genomic abnormalities in previously reported driver genes (Brennan et al.,  
142 2013; Verhaak et al., 2010b).

143

#### 144 ***Multi-activation of subtype signatures associated with intratumoral heterogeneity***

145 We observed that 34/369 (9.2%) samples showed significant enrichment of multiple  
146 ssGSEA scores (empirical classification p-value<0.05), suggesting these cases activate  
147 more than one transcriptional subtype (**Figure 2A**). To quantify this phenomenon, a  
148 score ranging from 0 to 1 was defined to quantitatively evaluate the simplicity of subtype  
149 activation based on order statistics of ssGSEA score. Samples with high simplicity  
150 scores activated a single subtype and those with lowest simplicity scores activated

151 multiple subtypes. All multi-subtype TCGA samples showed simplicity scores of less  
152 than 0.1 (**Figure 2A**). To determine whether transcriptional heterogeneity associated  
153 with genomic intratumoral heterogeneity, we correlated simplicity scores, total mutation  
154 rates and subclonal mutation rates. Included in the analysis were 224 TCGA GBMs with  
155 available whole exome sequencing data (Kim et al., 2015) and ABSOLUTE (Carter et  
156 al., 2012) determined high tumor purity ( $> 0.8$ ) to equalize the mutation detection  
157 sensitivity (Aran et al., 2015). Although not significant (Wilcoxon rank test p-  
158 value=0.143), the total mutation rate was less in the bottom 30% with lowest simplicity  
159 scores versus the top 30% samples with highest simplicity scores. The subclonal  
160 mutation rate was significantly higher (p-value=0.024) in samples with lowest simplicity  
161 scores (**Figure 2B; Table S3**), suggesting that increased intratumoral heterogeneity  
162 associates with increased transcriptional heterogeneity.

163 We compared outcomes amongst the three transcriptional groups and observed  
164 no significant differences (**Figure S4**). However, when restricting the analysis to  
165 samples with high simplicity scores, a clear trend of MES showing worst survival and  
166 PN the most favorable outcome became visible. For example, Kaplan-Meier analysis of  
167 88 samples with simplicity scores  $>0.99$  showed a median survival of 11.4, 14.7 and  
168 16.7 months were detected in MES, CL and PN, respectively, which was significantly  
169 different (log rank test,  $p=0.048$ )(**Figure 2C**)(**Figure S4**)(**Table S4**). Higher simplicity  
170 scores correlated with relative favorable outcome within the PN set, non-significant in  
171 the CL subtype, and correlated with relatively unfavorable survival in the MES class  
172 (**Figure S5**).



173           Single GBM cell RNA sequencing recently suggested that GBMs are comprised  
174 of a mixture of tumor cells with variable GBM subtype footprints (Patel et al., 2014). We  
175 used this data to classify 502 single GBM cells in addition to the bulk tumor derived from  
176 five primary glioblastomas (**Table S5**). All bulk tumor samples showed simplicity scores  
177 less than 0.05 suggesting high transcriptional heterogeneity compared to 45 of 369  
178 TCGA GBM samples with simplicity scores below 0.05 (**Figure 2D**). In four of five cases  
179 (MGH26, MGH28, MGH29 and MGH30), the bulk tumor samples were classified in the  
180 same primary subtype as the majority of their single cells (**Figure 2D**). Our analysis  
181 suggests that the heterogeneity observed at the single cell level is captured in the  
182 expression profile of the bulk tumor, and that the five GBM samples studied at the single  
183 cell level represented samples with relatively high transcriptional heterogeneity.

184

### 185 ***Transcriptional subtypes differentially activate the immune microenvironment***

186 Despite restricting the cluster analysis to genes exclusively expressed by GBM cells, we  
187 found that tumor purity predictions based on ABSOLUTE were significantly reduced in  
188 GBM classified as MES (Student T-test p-value < 10e-14; **Figure 3A**). This was  
189 corroborated by gene expression based predictions of tumor purity using the  
190 ESTIMATE method (Student T-test p-value < 10e-32; **Figure 3B**)(Yoshihara et al.,  
191 2013) . The ESTIMATE method has been optimized to quantify tumor-associated  
192 fibroblasts and immune cells (Yoshihara et al., 2013) and the convergence of a  
193 decreased ABSOLUTE and decreased ESTIMATE tumor purity confirmed previous  
194 suggestions on the increased presence of microglial and neuroglial cells mesenchymal  
195 GBM (Bao et al., 2006; Engler et al., 2012; Gabrusiewicz et al., 2016; Ye et al., 2012).

196 The mean simplicity score of samples classified as MES was 0.53 which was  
197 significantly lower than in PN (Wilcoxon rank test p-value<0.019) and CL subtypes  
198 (Wilcoxon rank test p-value<0.0001), confirming increased transcriptional heterogeneity.  
199 In order to identify genomic determinants of macrophage/microglia chemoattraction, we  
200 compared genomic alterations between mesenchymal class samples with high (n=51)  
201 and low (n=51) ABSOLUTE based tumor purity. GBM carrying hemizygous loss of *NF1*  
202 or somatic mutations in *NF1* showed reduced tumor purity compared to GBM with wild  
203 type *NF1* (Wilcoxon rank test p-value=0.0007) and this association was similarly  
204 detected when limiting the analysis to MES samples (Wilcoxon rank test p-  
205 value=0.017)(Figure S6). Formation of dermal neurofibromas in the context of *Nf1* loss  
206 of heterozygosity has been reported to be context and microenvironment dependent (Le  
207 et al., 2009). Functional studies may clarify whether NF1 deficient GBM are able to  
208 recruit cells that provide them with a proliferative advantage, or whether *NF1* loss  
209 provides that proliferative advantage in a specific tumor-associated microenvironment  
210 context.

211 To determine the cellular components of the tumor microenvironment across  
212 different transcriptional subtypes, we used the CIBERSORT in silico cytometry  
213 (Newman et al., 2015) method to evaluate absolute immune cell fractions. We  
214 evaluated 22 different immune cell types in 69 PN, 137 CL and 96 MES samples, after  
215 filtering samples with classification simplicity scores less than 0.1 (**Table S6**). Microglia  
216 are the resident macrophages in the central nervous system. Peripheral blood  
217 monocytes also give rise to tumor associated macrophages. These innate immune cells  
218 can be broadly classified as the proinflammatory M1 type and the alternative tumor

219 promoting M2 type(Hambardzumyan et al., 2015). The M2 macrophage gene signature  
220 showed a greater association with the MES subtype (13.4%) relative to the PN (4.6%)  
221 and CL (6.0%)(**Figure 3C**), consistent with previous analysis of the TCGA  
222 database(Doucette et al., 2013; Gabrusiewicz et al., 2016). In addition to the M2  
223 macrophage gene signature, there was also a significantly higher fraction of MES  
224 samples that expressed M1 macrophage (Student T-test p-value 3.20E-5) and  
225 neutrophil (Student T-test p-value 1.30E-9) gene signatures. In contrast, the activated  
226 natural killer T-cell gene signature (Student T-test p-value 4.91E-2) was significantly  
227 reduced in the MES subtype and resting memory CD4+ T cells (Student T-test p-value  
228 5.40E-7) were less frequently expressed in the PN subtype.

229 To confirm the association of macrophages/microglia with the MES GBM subtype,  
230 we assessed protein expression levels of the *ITGAM* (alternatively known as CD11B)  
231 and *IBA1* (also known as AIF1) macrophage/microglial markers in a set of 18 GBM for  
232 which we also characterized the expression subtype (**Figure 3D**) as well as through  
233 immunohistochemistry (**Figure S7**). We confirmed the microenvironment as the main  
234 source for *ITGAM/IBA1* transcription by comparing transcriptional levels in 37 GBM-  
235 neurosphere pairs used for gene filtering, which showed that neurospheres do not  
236 express *ITGAM/IBA1* (**Figure 3E**). The association of the MES GBM subtype with  
237 increased level of M2 microglia/macrophages may suggest that in particular MES GBM  
238 are candidates for therapies directed against tumor-associated macrophages(Pyonteck  
239 et al., 2013). Activated dendritic cell signatures (Student T-test p-value 7.36E-3)(**Figure**  
240 **3C**) were significantly higher in the CL subtype, suggesting this subtype may benefit  
241 from dendritic cell vaccines (Palucka and Banchereau, 2012). Dendritic cells may

242 require an activated phenotype in order to direct the immune system. A previous study  
243 suggested that MES GBM patients treated with dendritic cells were more likely to  
244 benefit (Prins et al., 2011).

245

### 246 ***Phenotypic plasticity upon GBM recurrence***

247 Glioblastoma has long been hypothesized to progress along a proneural to  
248 mesenchymal axis(Phillips et al., 2006). To determine the relevance of this transition  
249 process in IDH wildtype glioma evolution, we performed a longitudinal analysis of the  
250 subtype classification and tumor-associated microenvironment in sample pairs obtained  
251 at diagnosis and first disease recurrence from 124 glioma patients. The cohort included  
252 96 initial GBM and first recurrence, eight pairs of primary low grade glioma and  
253 matching secondary GBM, and 20 pairs of primary and recurrent low grade glioma.  
254 Gene expression profiles of 78 tumor pairs were analyzed through transcriptome  
255 sequencing, and remaining pairs were generated using Affymetrix (n = 31) and Illumina  
256 (n = 15) microarray, respectively. To facilitate exploration of this dataset we have made  
257 it available through the GlioVis portal <http://recur.bioinfo.cnio.es/>. We used a gene  
258 expression signature(Baysan et al., 2012) to determine that 33 of 124 cases were IDH-  
259 mutant/GCIMP at presentation and recurrence (**Table S7**). We used the renewed gene  
260 signatures and classification method to determine molecular subtype of the 91 pairs of  
261 IDH wild type cases and found that expression class remained consistent after disease  
262 recurrence for 48 of 91 IDH-wildtype cases (52%)(**Figure 4A**). The MES subtype was  
263 most stable (64%) while the CL (47%) and PN (43%) phenotypes were less frequently  
264 retained. Nine, sixteen and eighteen post-treatment tumors switched subtypes to

265 become CL, MES and PN at disease recurrence, respectively, indicating that PN and  
266 MES increased in frequency after recurrence while the CL subtype was least frequently  
267 found (**Figure 4A**). The CL expression class was previously found to be most sensitive  
268 to intensive therapy and it is possible that therapy provides a competitive advantage for  
269 non-CL cells, which could explain the reduced post-treatment incidence(Verhaak et al.,  
270 2010b). Our results did not identify enrichment for proneural to mesenchymal transitions.

271 We observed a significant difference in transcriptional simplicity between primary  
272 GBM retaining their expression class, versus those that switched to a different  
273 phenotype (**Figure 4B**). GBMs with a primary tumor simplicity score greater than 0.5,  
274 indicated lower transcriptional heterogeneity, were classified as the same subtype in 31  
275 of 48 (64.5%) cases, compared to 15 of 41 (36.6%) cases with primary tumor simplicity  
276 scores less than 0.5 (Fisher exact test p-value=0.01).

277

### 278 ***Microenvironment transitions upon GBM recurrence***

279 Debulking surgery, radiotherapy and chemotherapy provide therapeutic barriers but  
280 nonetheless induce tumor evolution, including influences on the tumor  
281 microenvironment. We explored this possibility by comparing the tumor associated  
282 microenvironment in primary and recurrent GBMs using CIBERSORT (**Table**  
283 **S8**)(Newman et al., 2015). A comparison between 91 primary and recurrent IDH-wild  
284 type tumors revealed a decrease in monocyte gene signature expression at recurrence,  
285 suggesting relative depletion of circulation derived monocytes (**Figure 5A**). Next, we  
286 dissected microenvironment fluctuations between diagnosis and recurrent tumors  
287 across different subtype combinations. Primary non-MES (CL or PN) tumors showed

288 relatively high tumor purity and consequently, recurrent tumors classified as non-MES  
289 demonstrated a relatively global decrease of immune cells while cases transitioning to  
290 MES at recurrence represented a trend towards increased immune cell fractions  
291 **(Figure 5B)**. Gene signatures of immunosuppressive regulatory T cells showed an  
292 increase in gene expression at recurrence across several primary-recurrence subtype  
293 combinations although the inferred cellular fractions are relatively small **(Figure 5B)**. In  
294 contrast to the trend of monocyte depletion, the imputed M2 macrophage frequency was  
295 significantly higher at recurrence in cases transitioning to MES **(Figure 5C)**. This  
296 observation converges with the higher predicted fraction of M2 macrophages in primary  
297 MES GBM relative to primary non-MES GBM. M1 macrophages and neutrophils also  
298 correlated with primary MES GBM, but these associations were not confirmed for  
299 recurrent GBM. We validated the increase in macrophages using immunostaining of  
300 IBA1 expression in two primary-recurrent GBM pairs which were classified as CL to  
301 MES **(Figure 5D)**. IBA1 immunoexpression was restricted to macrophages/microglia,  
302 cells exhibiting either globular or filamentous/spidery morphology, with no expression in  
303 glioma tumor cells **(Figure 5D)**. Quantitative analysis of microglia frequency using  
304 Inform software for automated pathology imaging processing confirmed a significantly  
305 higher presence (p value = 2.25e-11 and 2.12e-13 for patient #1 and #2, respectively) of  
306 at MES recurrence **(Figure 5E)**. These findings further solidify the association between  
307 MES GBM and macrophage/microglia and extend this mutual relationship to disease  
308 recurrence. MES tumors at recurrence compared to primary MES tumors showed an  
309 increase in transcriptional activity associated with non-polarized M0 macrophages,  
310 which has been previously described (Gabrusiewicz et al., 2016), but also dendritic cells

311 which is potentially motivated by the increased levels of neoantigens at disease  
312 recurrence (Kim et al., 2015). In contrast, primary PN GBM were found to contain  
313 significantly higher fractions of five immune cell categories compared to recurrent PN  
314 GBM, indicating a relative absence of immune infiltration in PN GBM upon recurrence.

315 We evaluated the effect of transcriptional class on patient survival. The analysis  
316 was restricted to 50 cases for whom annotation on overall survival (OS) time and time to  
317 disease progression (PFS) were available and with high simplicity scores, indicating low  
318 transcriptional heterogeneity. We confirmed the worse prognosis for patients whose  
319 primary tumor was classified as MES on overall survival (logrank test  $p=0.029$  with  
320  $HR=1.97$ )(**Figure 6A; Figure 6B**). This pattern was retained in patients whose  
321 secondary glioma was classified as MES (logrank test  $p=0.09$  with  $HR=1.71$ )(**Figure 6C;**  
322 **Figure 6D**). Consequently, cases for whom both primary and recurrent tumor were  
323 classified as MES subtype showed the least favorable outcome, suggesting an additive  
324 effect of transcriptional class at different time points (**Figure 6E, Figure 6F**)(**Figure S8**).

325

### 326 ***Treatment-Induced Immunological Microenvironment Changes upon GBM*** 327 ***recurrence***

328 Temozolomide treatment of gliomas can induce hypermutation(Hunter et al., 2006; Kim  
329 et al., 2015). Missense mutations may generate neoantigens that can be recognized  
330 which by CD8+ T lymphocytes (Schumacher and Schreiber, 2015). Using matching  
331 exome data we classified five recurrent gliomas in our dataset as being hypermutated at  
332 ( $\geq 400$  SNVs). The predicted frequency of CD8+ T cells was significantly increased at  
333 recurrence in comparison to their primary tumors (median 7.7% vs 1.9%; Wilcoxon rank

334 test p-value=0.008)(**Figure 7A**). This observation was further validated by comparing  
335 seven hypermutated primary GBMs to 238 non-hypermutated GBMs (median 7.0‰ vs  
336 0‰; Wilcoxon rank test p-value=0.031)(**Figure 7B**). The majority (61%) of non-  
337 hypermutated primary GBMs showed predicted CD8+ T cell fractions equal to zero. The  
338 observation suggests that patients with hypermutated tumors are more likely to benefit  
339 from CD8+ T cell antitumor immunity.

340         Preclinical studies suggested radiation may increase the recruitment of T cells in  
341 the tumor microenvironment (Deng et al., 2014; Zeng et al., 2013). We compared the  
342 microenvironment of primary GBM treated with radiation therapy and separated short  
343 term relapse (PFS > 6 months, n = 27) from late relapse (PFS > 12 months, n = 21).  
344 Evaluating the gene signature based presence of M2 macrophages and CD4+ T cells  
345 (CD4+ T memory resting and CD4+ follicular helper cells) in 75 IDHwt GBM pairs whom  
346 received radiotherapy, we observed no significant difference between primary tumors  
347 with short-term and long-term relapse but found a significant increase after radiation at  
348 recurrence (**Figure 7C, D, E**). M2 macrophages have been speculated to play a role in  
349 resistance to radiotherapy(Meng et al., 2010; Ruffell and Coussens, 2015) and  
350 macrophage targeting immunotherapy (Pyonteck et al., 2013; Ries et al., 2014) may  
351 play a radiosensitizing role. The increasing of CD4+ T cells at recurrence for short term  
352 relapse tumors points towards inhibiting CTLA-4 as adjuvant therapy to radiation.

353



354 **DISCUSSION**

355 Transcriptome profiling of tumor samples is a commonly used modality for interrogating  
356 pathway functionality and phenotype based patient classification. The transcriptional  
357 footprint left by the tumor microenvironment, which may constitute 10-80% of cells in a  
358 tumor biopsy(Yoshihara et al., 2013), can obscure the true activity of the signaling  
359 network(Isella et al., 2015; Kim and Verhaak, 2015). Here, we employed in silico  
360 methods to integrate mRNA expression profiles from glioma samples and glioma cell  
361 culture models to provide insights into glioma-intrinsic pathway activities and  
362 classification, and to deconvolute the glioma associated stroma into its immunological  
363 cellular components.

364 GBM expression subtype classification has emerged as an important concept to  
365 better understand the biology of this devastating disease (Dunn et al., 2012; Huse et al.,  
366 2011; Sturm et al., 2014). Robust classification of new GBM tumors is therefore critical  
367 to ensure consistency in reporting between different studies. The transcriptional glioma  
368 subtypes we discovered using tumor-intrinsic gene expression values strongly  
369 overlapped with the proneural, classical and mesenchymal subtypes but identified the  
370 neural class as normal neural lineage contamination. Our updated methods, released  
371 through a R-library, were found to be highly robust and provide the community with a  
372 standardized strategy for classification of gliomas.

373 Through re-classification of primary GBM samples from TCGA and despite using  
374 tumor-only transcripts, we observed that the mesenchymal GBM subtype associated  
375 with the presence of tumor-associated glial and microglial cells. Mesenchymal glioma  
376 cell differentiation status has been found to correlate with enrichment of

377 macrophages/microglia (Bhat et al., 2013; Kreutzberg, 1996). Through in silico cell type  
378 identification we additionally detected enrichment of various adaptive immunity cell  
379 types, including CD4+ T lymphocytes.

380 Longitudinal analysis of tumor samples is complicated by the lack of tissue  
381 collections including such pairs. Through aggregation of existing and novel datasets we  
382 compiled a cohort of 124 glioma pairs, including 91 pairs of IDH wild type tumors.  
383 Comparison of pairs of initial gliomas and first disease recurrence did not identify the  
384 trend of proneural GBM transitioning to a mesenchymal phenotype that has often been  
385 suspected (Phillips et al., 2006). Mesenchymal subtype at diagnosis and at disease  
386 recurrent correlated with relatively poor outcome. The recurrent IDH wild type GBM  
387 immuno environment showed fewer blood derived monocytes which may reflect lower  
388 penetration through the blood brain barrier. While the frequency of M2  
389 macrophage/microglia was increased in recurrent mesenchymal GBM compared to  
390 primary non-mesenchymal GBM, the overall fraction of M2 macrophage/microglia  
391 remained stable. This possibly suggests that the majority of these cells are derived from  
392 resident CNS macrophages than through active recruitment from the circulation.

393 In summary, our study defines a new strategy to determine transcriptional  
394 subtype, and associated expression classes to the tumor-associated immuno-  
395 environment. Our findings may aid in the implementation of immunotherapy approaches  
396 (Blank et al., 2016) in a disease type with very limited treatment options. Collectively,  
397 our results have improved our understanding of determinants of GBM subtype  
398 classification, the critical impact of the tumor microenvironment, and provide new  
399 handles on the interpretation of transcriptional profiling of glioma.

## 400 **EXPERIMENTAL PROCEDURES**

### 401 ***Collection of pairs of primary and recurrent glioma samples***

402 U133A array profiles for 543 primary GBM, and RNA-Seq data for 166 primary and 13  
403 recurrent GBM were obtained from the TCGA portal <https://tcga-data.nci.nih.gov/tcga/>.  
404 Mutation calls and DNA copy number profiles were obtained for all samples, where  
405 available. Tissues from 20 additional initial GBM and matched recurrent tumor were  
406 obtained from Henry Ford Hospital (n = 9) in accordance with institutional policies and  
407 all patients provided written consent, with approval from the Institutional Review Boards  
408 (Henry Ford Hospital IRB protocol #402). All RNA samples tested were obtained from  
409 frozen specimens. All of the recurrent GBMs had been previously treated with  
410 chemotherapy and radiation. Three cases had a history of lower grade astrocytoma  
411 prior to the first GBM (HF-2869/HF-3081/HF-3162). Tumors were selected solely on the  
412 basis of availability. RNA-Seq libraries were generated using RNA Truseq reagents  
413 (Illumina, San Diego, CA, USA) and paired-end sequenced using standard Illumina  
414 protocols. Read length was 76 base pairs for cases sequenced by TCGA and from  
415 Henry Ford (processed at MD Anderson). RNA-Seq data on frozen tissue from 44  
416 patients with initial and recurrent GBM that received resection at Samsung Medical  
417 Center and Seoul National University Hospital were provided by Dr. Nam's lab. Surgery  
418 specimens were obtained in accordance to the Institutional Review Board (IRB) of the  
419 Samsung Medical Center (No. 2010-04-004) and Seoul National University Hospital (No.  
420 C-1404-056-572). Affymetrix CEL files of 39 pairs of initial and recurrent glioma were  
421 retrieved from the Gene Expression Omnibus (GEO accession GSE4271, GSE42670,  
422 GSE62153)(Joo et al., 2013; Kwon et al., 2015; Phillips et al., 2006). The expression

423 profiles of the 23 pairs from GSE4271 were determined using Affymetrix HG-U133  
424 GeneChips, the 1 pairs from GSE42670 were analyzed using the Affmetrix HuGene-1-  
425 0-st platform, the 15 pairs from GSE62153 were analyzed using Illumina Human HT-12  
426 V4.0 expression BeadChip. The RNA sequencing data of 14 and 5 pairs of primary and  
427 recurrent low grade glioma were from TCGA LGG cohort and  
428 EGAS00001001255(Mazor et al., 2015), respectively.

429 Genome wide DNA copy number profiling and exome sequencing on thirteen  
430 TCGA tumor pairs and nine of ten Henry Ford tumor pairs were performed and data  
431 was analyzed using standard protocols and pipelines as previously described (Kim et al.,  
432 2015).

433

#### 434 ***Data for multiplatform classification comparison***

435 RNA sequencing data was available for 162 primary GBMs(Brennan et al., 2013) for  
436 which an Affymetrix HT-U133A gene expression profile was also available. We  
437 observed a low Pearson Correlation Coefficient ( $< 0.15$ ) between RNA sequencing  
438 based reads per kilo base of transcript per million reads (RPKM) and Affymetrix HT-  
439 U133A profiles in eighteen cases and these were removed from further analysis. In  
440 summary, in order to assess the concordance between classification results of the new  
441 70-gene signatures and previously published 210-gene signatures (Verhaak et al.,  
442 2010b), 144 GBMs which were profiled in both RNA sequencing and Affymetrix U133A  
443 platforms were used in our further analyses.

444

#### 445 ***Transcriptome Data processing***

446 The latest version custom CDF files (Version19, <http://brainarray.mbni.med.umich.edu>)  
447 (Dai et al., 2005; Sandberg and Larsson, 2007) were used to map probes from the  
448 Affymetrix HG-U133A and HuGene-1\_0-st GeneChip platforms to the Ensemble  
449 transcript database, combined in one probe set per gene and normalized using the  
450 AROMA package with default parameters, resulting in RMA normalized and log  
451 transformed gene expression values (Bengtsson et al., 2009). All RNA sequencing data  
452 was processed by the PRADA pipeline (Torres-Garcia et al., 2014). Briefly, reads were  
453 aligned using BWA against the genome and transcriptome. After initial mapping, the  
454 aligned reads were filtered out if their best placements are only mapped to unique  
455 genomic coordinates. Quality scores are recalibrated using the Genome Analysis  
456 Toolkit (GATK), and duplicate reads are flagged using Picard. Mapped features were  
457 quantified and normalized per kilo base of transcript per million reads (RPKM) and were  
458 converted to a log<sub>2</sub> scale to represent a gene expression level. RPKM values  
459 measuring the same gene that mapped to the Ensemble transcript with longest size  
460 were selected to obtain one expression value per gene and sample. RPKM values were  
461 converted to a log<sub>2</sub> scale to represent gene expression level. The statistical  
462 environment R was used to perform all the statistical analysis and graph plots.

463

#### 464 ***Deriving new gene signatures***

465 A pair-wise gene expression analysis identified 5,334 genes which are significant higher  
466 expressed in glioma bulk samples compared to their derivative GSCs. These genes  
467 were discarded from the gene list for developing tumor-specific molecular subtypes.  
468 Consensus non-negative matrix factorization (CNMF) clustering method identified three

469 distinct subgroups among the 369 IDHwt primary GBMs. A set of 270 GBMs was  
470 recognized as core samples based on a positive silhouette width. The gene expression  
471 values of each subtype were compared with those from the other two subtypes  
472 combined (Verhaak et al., 2010b). Signature genes per cluster were selected on the  
473 basis of differences in gene expression level and were considered significant if they  
474 reached the cut-off value with t-test  $p\text{-value} < 1E\text{-}3$  for higher expressed in this class,  
475 while also showing a significant lower expression with t-test  $p\text{-value} < 1E\text{-}3$  in the other  
476 two classes. In the original gene signatures, genes could be either down-regulated or  
477 up-regulated, while only up-regulated genes ( $n=70$  per gene signature) were selected  
478 for revised gene signatures. Only genes measured on both RNAseq and U133A  
479 platforms were considered, and the U133A data from 162 GBM samples measured on  
480 both platforms (which included the 144 cases used to compare U133A and RNAseq  
481 results) was used in the final comparative analysis.

482

### 483 ***Molecular classifications based on ssGSEA enrichment scores***

484 Single sample gene set enrichment analysis was performed as follows. For a given  
485 GBM sample, gene expression values were rank-normalized and rank-ordered. The  
486 Empirical Cumulative Distribution Functions (ECDF) of the signature genes and the  
487 remaining genes were calculated. A statistic was calculated by integration of the  
488 difference between the ECDFs, which is similar to the one used in GSEA but is based  
489 on absolute expression rather than differential expression (Barbie et al., 2009). Since  
490 the ssGSEA test is based on the ranking of genes by expression level, the uncentered  
491 and log-transformed U133A and RPKM expression levels were used as input for

492 ssGSEA. Since the scores of the three signatures were not directly comparable, we  
493 performed a resampling procedure to generate null distributions for each of the four  
494 subtypes. First we generated a large number of virtual samples in which each gene  
495 obtains its expression level by randomly selecting an expression value of the same  
496 gene in the remainder of the samples. Then, the three ssGSEA scores for each  
497 signature were calculated. Following this procedure we generated a large number  
498 (>1,000,000) of random ssGSEA scores for each subtype, to build the null distribution  
499 and to give empirical p-values for the raw ssGSEA scores of each sample. By testing on  
500 multiple datasets with different sample sizes, we found the resampling generated  
501 distribution could be replaced with Student-T distribution (sample size>30) or Normal  
502 distribution (sample size>50) for getting very similar results. R-library with the code and  
503 expression matrices used is provided as supplementary file..

504

### 505 ***Evaluate the simplicity of subtype activation***

506 For a single sample, we decreased rank the empirical p-values for each subtype to  
507 generate order statistics as  $R_{N-1}, R_{N-2} \dots R_1, R_0$ . In particular,  $R_0$  equals to the minimum  
508 empirical p-value and points to the dominant subtype, i.e., the most significantly  
509 activated subtype. The accumulative distance to the dominant subtype (ADDS) was  
510 defined as:

$$ADDS = \sum_{i=1}^{N-1} (R_i - R_0)$$

511 Similarly, the accumulative distance between non-dominant subtypes (ADNS) as:

$$ADNS = \sum_{j>i>0} (R_j - R_i)$$

512 Obviously, the ADDS and ADNS are positive and negative correlated with single  
513 activation, respectively. Hence, we defined the simplicity score by combing ADDS and  
514 ADNS together and corrected with a constant  $\frac{(R_{N-1}-R_0)}{N-1}$  as follows:

$$\text{Simplicity score} = [\text{ADDS} - \text{ADNS}] \times \frac{(R_{N-1} - R_0)}{N - 1}.$$

515

### 516 ***Tumor purity assessment***

517 The ESTIMATE package was used to evaluate tumor purity on the basis of the  
518 expression level of marker genes in stromal and immune cells (Yoshihara et al., 2013),  
519 where the fraction of stromal cells and immune cells in each sample were represented  
520 by stromal score and immune score respectively, and the mixed fraction of both stromal  
521 and immune cells was represented by estimate scores. The ABSOLUTE package was  
522 used to confirm the tumor purity on the basis of chromosome copy number and allele  
523 fraction ratios on samples for which single nucleotide polymorphism array data were  
524 available (Carter et al., 2012).

525

### 526 ***Sample collection and Neurosphere Cultures***

527 After obtaining approval from the institutional review board of The University of Texas  
528 M.D. Anderson Cancer Center, glioblastoma tumor tissues were collected and named in  
529 the order that they were acquired. Each tissue was enzymatically and mechanically  
530 dissociated into single cells and grown in DMEM/F12 media supplemented with B27  
531 (Invitrogen), EGF (20 ng/ml), and bFGF (20 ng/ml), resulting in neurosphere growth. All  
532 cell lines were tested to exclude the presence of Mycoplasma infection. To minimize  
533 any batch effect the downstream molecular analyses were performed on identical cell



534 culture batches. Total RNA from formalin fixed, paraffin embedded tumor tissues and  
535 matching neurospheres was prepared using the Masterpure complete DNA and RNA  
536 isolation kit (Epicenter) after proteinase K digestion per to the instructions from the  
537 manufacturer. Paired-end Illumina HiSeq sequencing assays were performed resulting  
538 in a medium number of 50 million 75bp paired end reads per sample. We employed the  
539 PRADA pipeline to process the RNA sequencing data (Torres-Garcia et al., 2014). In  
540 short, Burroughs-Wheeler alignment, Samtools, and Genome Analysis Toolkit were  
541 used to map short reads to the human genome (hg19) and transcriptome (Ensembl 64)  
542 and RPKM gene expression values were generated for each of the 135,994 transcripts  
543 of 21,165 protein coding genes in Ensembl database.

544

#### 545 ***Western blotting***

546 Lysates were prepared from fresh frozen sections using RPPA lysis buffer (1% Triton X-  
547 100 50mM HEPES pH 7.4, 150mM NaCl, 1.5mM MgCl<sub>2</sub>, 1mM EGTA, 100mM NaF,  
548 10mM Na pyrophosphate, 1mM Na<sub>3</sub>VO<sub>4</sub>, 10% glycerol, plus protease and phosphatase  
549 inhibitors cocktails from Roche Applied Science #05056489001 and 04906837001), with  
550 sonication and clearing by centrifugation at 10,000g. Protein concentration was  
551 measured using the BCA kit (Thermo Scientific - Pierce #23225). SDS-PAGE and  
552 western blotting was performed using Midi gel system (Life Technologies - #WR0100)  
553 and NuPage-Novex 4-12% Bis-Tris Midi (20-well) Protein Gels (Life Technologies -  
554 #WG1402) using the following antibodies: ITGAM (CD11B) (Sigma Aldrich –  
555 #HPA002274), IBA1 (AIF1) (Sigma Aldrich – #HPA049234), GFAP (Cell Signalling –

556 #3670), YKL40 (CHI3L1) YKL40 (CHI3L1, Santa Cruz Biotechnology - #sc-30465) a-  
557 actinin (Sigma Aldrich A5044) and Tubulin (Sigma Aldrich T9026).

558

### 559 ***Immunohistochemistry***

560 Formalin-fixed, paraffin-embedded tissue sections (4 µm thick) were collected on  
561 Superfrost plus slides. Briefly, tissue sections were deparaffinized with xylene and  
562 ethanol and re-hydrated with 95, 70 and 50% ethanol. Sections were antigen unmasked  
563 using citrate buffer (Vector Labs #H-3300) and heating. Peroxidase block was  
564 conducted with 3% H<sub>2</sub>O<sub>2</sub> and blocking was with 5% goat serum (Vector Labs #S-1000).  
565 Primary rabbit polyconal antibody against IBA1 (AIF1)(WAKO #016-20001) at 1:400  
566 was used overnight. Secondary antibody was done using with the Rabbit-on-Rodent  
567 HRP-Polymer (Biocare #RMR622L) for 1 hr at room temperature. The slides were  
568 developed with Nova-red (Vector Labs #SK-4800) and counterstained with  
569 haematoxylin, mounted and scanned with Panoramic 250 slide scanner (Caliper Life  
570 Sciences). Unbiased quantification of microglial (IBA1+) percentage in primary and  
571 recurrent GBMs was performed using the Caliper Vectra image system and InForm  
572 analysis software. Thirty scan fields were automatically selected on from entire tumor  
573 section. Nineteen scan fields were select from the primary tumor of patient #2 due to the  
574 small size of tumor section. Percentages of the median and high levels (2+, 3+) of IBA1  
575 were used for the comparison.

576

577 **Acknowledgments**

578 The authors thank Katherine Stemke-Hale for assistance in manuscript editing. The  
579 results published here are in part based upon data generated by The Cancer Genome  
580 Atlas project established by the National Cancer Institute (NCI) and the National Human  
581 Genome Research Institute (NHGRI) of the National Institutes of Health. Information  
582 about TCGA and the investigators and institutions that constitute the TCGA research  
583 network can be found at <http://cancergenome.nih.gov>. This work is supported by grants  
584 from the National Institutes of Health grants P50 CA127001 (EPS, RGWV), R01  
585 CA190121 (EPS, RGWV), P01 CA085878 (RGWV); RO1 CA120813 (ABH), and P30  
586 CA016672 (MD Anderson Cancer Center Support Grant for the Sequencing and  
587 Microarray Facility); Cancer Prevention & Research Institute of Texas (CPRIT) grant  
588 number R140606, the University Cancer Foundation via the Institutional Research  
589 Grant program at the University of Texas MD Anderson Cancer Center (RGWV); the  
590 National Brain Tumor Association Defeat GBM project (EPS, RGWV), the National  
591 Brain Tumor Association Oligo Research Fund (RGWV); the Korea Health Technology  
592 R&D Project through the Korea Health Industry Development Institute (KHIDI), funded  
593 by the Ministry of Health & Welfare, Republic of Korea (HI14C3418, DHN).

594

## 595 References

- 596 Aran, D., Sirota, M., and Butte, A. J. (2015). Systematic pan-cancer analysis of tumour purity. *Nat*  
597 *Commun* 6, 8971.
- 598 Bao, S., Wu, Q., McLendon, R. E., Hao, Y., Shi, Q., Hjelmeland, A. B., Dewhirst, M. W., Bigner, D. D., and  
599 Rich, J. N. (2006). Glioma stem cells promote radioresistance by preferential activation of the DNA  
600 damage response. *Nature* 444, 756-760.
- 601 Barbie, D. A., Tamayo, P., Boehm, J. S., Kim, S. Y., Moody, S. E., Dunn, I. F., Schinzel, A. C., Sandy, P.,  
602 Meylan, E., Scholl, C., *et al.* (2009). Systematic RNA interference reveals that oncogenic KRAS-driven  
603 cancers require TBK1. *Nature* 462, 108-112.
- 604 Baysan, M., Bozdog, S., Cam, M. C., Kotliarova, S., Ahn, S., Walling, J., Killian, J. K., Stevenson, H., Meltzer,  
605 P., and Fine, H. A. (2012). G-cimp status prediction of glioblastoma samples using mRNA expression data.  
606 *PLoS one* 7, e47839.
- 607 Bengtsson, H., Ray, A., Spellman, P., and Speed, T. P. (2009). A single-sample method for normalizing and  
608 combining full-resolution copy numbers from multiple platforms, labs and analysis methods.  
609 *Bioinformatics* 25, 861-867.
- 610 Bhat, K. P., Balasubramaniyan, V., Vaillant, B., Ezhilarasan, R., Hummelink, K., Hollingsworth, F., Wani, K.,  
611 Heathcock, L., James, J. D., Goodman, L. D., *et al.* (2013). Mesenchymal differentiation mediated by NF-  
612 kappaB promotes radiation resistance in glioblastoma. *Cancer cell* 24, 331-346.
- 613 Blank, C. U., Haanen, J. B., Ribas, A., and Schumacher, T. N. (2016). CANCER IMMUNOLOGY. The "cancer  
614 immunogram". *Science* 352, 658-660.
- 615 Brennan, C. W., Verhaak, R. G., McKenna, A., Campos, B., Nounshmehr, H., Salama, S. R., Zheng, S.,  
616 Chakravarty, D., Sanborn, J. Z., Berman, S. H., *et al.* (2013). The somatic genomic landscape of  
617 glioblastoma. *Cell* 155, 462-477.
- 618 Cancer Genome Atlas Research, N. (2008). Comprehensive genomic characterization defines human  
619 glioblastoma genes and core pathways. *Nature* 455, 1061-1068.
- 620 Cancer Genome Atlas Research, N., Brat, D. J., Verhaak, R. G., Aldape, K. D., Yung, W. K., Salama, S. R.,  
621 Cooper, L. A., Rheinbay, E., Miller, C. R., Vitucci, M., *et al.* (2015). Comprehensive, Integrative Genomic  
622 Analysis of Diffuse Lower-Grade Gliomas. *N Engl J Med* 372, 2481-2498.
- 623 Carter, S. L., Cibulskis, K., Helman, E., McKenna, A., Shen, H., Zack, T., Laird, P. W., Onofrio, R. C.,  
624 Winckler, W., Weir, B. A., *et al.* (2012). Absolute quantification of somatic DNA alterations in human  
625 cancer. *Nat Biotechnol* 30, 413-421.
- 626 Ceccarelli, M., Barthel, F. P., Malta, T. M., Sabedot, T. S., Salama, S. R., Murray, B. A., Morozova, O.,  
627 Newton, Y., Radenbaugh, A., Pagnotta, S. M., *et al.* (2016). Molecular Profiling Reveals Biologically  
628 Discrete Subsets and Pathways of Progression in Diffuse Glioma. *Cell* 164, 550-563.
- 629 Dai, M., Wang, P., Boyd, A. D., Kostov, G., Athey, B., Jones, E. G., Bunney, W. E., Myers, R. M., Speed, T.  
630 P., Akil, H., *et al.* (2005). Evolving gene/transcript definitions significantly alter the interpretation of  
631 GeneChip data. *Nucleic Acids Res* 33, e175.
- 632 Deng, L., Liang, H., Burnette, B., Beckett, M., Darga, T., Weichselbaum, R. R., and Fu, Y. X. (2014).  
633 Irradiation and anti-PD-L1 treatment synergistically promote antitumor immunity in mice. *J Clin Invest*  
634 124, 687-695.
- 635 Doucette, T., Rao, G., Rao, A., Shen, L., Aldape, K., Wei, J., Dziurzynski, K., Gilbert, M., and Heiberger, A.  
636 B. (2013). Immune heterogeneity of glioblastoma subtypes: extrapolation from the cancer genome atlas.  
637 *Cancer Immunol Res* 1, 112-122.
- 638 Dunn, G. P., Rinne, M. L., Wykosky, J., Genovese, G., Quayle, S. N., Dunn, I. F., Agarwalla, P. K., Chheda,  
639 M. G., Campos, B., Wang, A., *et al.* (2012). Emerging insights into the molecular and cellular basis of  
640 glioblastoma. *Genes Dev* 26, 756-784.
- 641 Engler, J. R., Robinson, A. E., Smirnov, I., Hodgson, J. G., Berger, M. S., Gupta, N., James, C. D., Molinaro,  
642 A., and Phillips, J. J. (2012). Increased microglia/macrophage gene expression in a subset of adult and  
643 pediatric astrocytomas. *PLoS One* 7, e43339.
- 644 Gabrusiewicz, K., Rodriguez, B., Wei, J., Hashimoto, Y., Healy, L. M., Maiti, S. N., Thomas, G., Zhou, S.,  
645 Wang, Q., Elakkad, A., *et al.* (2016). Glioblastoma-infiltrated innate immune cells resemble M0  
646 macrophage phenotype. *JCI insight* 1.

647 Galli, R., Binda, E., Orfanelli, U., Cipelletti, B., Gritti, A., De Vitis, S., Fiocco, R., Foroni, C., Dimeco, F., and  
648 Vescovi, A. (2004). Isolation and characterization of tumorigenic, stem-like neural precursors from  
649 human glioblastoma. *Cancer Res* *64*, 7011-7021.

650 Gill, B. J., Pisapia, D. J., Malone, H. R., Goldstein, H., Lei, L., Sonabend, A., Yun, J., Samanamud, J., Sims, J.  
651 S., Banu, M., *et al.* (2014). MRI-localized biopsies reveal subtype-specific differences in molecular and  
652 cellular composition at the margins of glioblastoma. *Proc Natl Acad Sci U S A* *111*, 12550-12555.

653 Hambardzumyan, D., Gutmann, D. H., and Kettenmann, H. (2015). The role of microglia and  
654 macrophages in glioma maintenance and progression. *Nature neuroscience* *19*, 20-27.

655 Hunter, C., Smith, R., Cahill, D. P., Stephens, P., Stevens, C., Teague, J., Greenman, C., Edkins, S., Bignell,  
656 G., Davies, H., *et al.* (2006). A hypermutation phenotype and somatic MSH6 mutations in recurrent  
657 human malignant gliomas after alkylator chemotherapy. *Cancer Res* *66*, 3987-3991.

658 Huse, J. T., Phillips, H. S., and Brennan, C. W. (2011). Molecular subclassification of diffuse gliomas:  
659 seeing order in the chaos. *Glia* *59*, 1190-1199.

660 Isella, C., Terrasi, A., Bellomo, S. E., Petti, C., Galatola, G., Muratore, A., Mellano, A., Senetta, R., Cassenti,  
661 A., Sonetto, C., *et al.* (2015). Stromal contribution to the colorectal cancer transcriptome. *Nat Genet* *47*,  
662 312-319.

663 Joo, K. M., Kim, J., Jin, J., Kim, M., Seol, H. J., Muradov, J., Yang, H., Choi, Y. L., Park, W. Y., Kong, D. S., *et*  
664 *al.* (2013). Patient-specific orthotopic glioblastoma xenograft models recapitulate the histopathology  
665 and biology of human glioblastomas in situ. *Cell Rep* *3*, 260-273.

666 Kim, H., and Verhaak, R. G. (2015). Transcriptional mimicry by tumor-associated stroma. *Nat Genet* *47*,  
667 307-309.

668 Kim, H., Zheng, S., Amini, S. S., Virk, S. M., Mikkelsen, T., Brat, D. J., Grimsby, J., Sougnéz, C., Muller, F.,  
669 Hu, J., *et al.* (2015). Whole-genome and multisector exome sequencing of primary and post-treatment  
670 glioblastoma reveals patterns of tumor evolution. *Genome Res* *25*, 316-327.

671 Kreutzberg, G. W. (1996). Microglia: a sensor for pathological events in the CNS. *Trends Neurosci* *19*,  
672 312-318.

673 Kwon, S. M., Kang, S. H., Park, C. K., Jung, S., Park, E. S., Lee, J. S., Kim, S. H., and Woo, H. G. (2015).  
674 Recurrent Glioblastomas Reveal Molecular Subtypes Associated with Mechanistic Implications of Drug-  
675 Resistance. *PLoS One* *10*, e0140528.

676 Le, L. Q., Shipman, T., Burns, D. K., and Parada, L. F. (2009). Cell of origin and microenvironment  
677 contribution for NF1-associated dermal neurofibromas. *Cell Stem Cell* *4*, 453-463.

678 Martinez, E., Yoshihara, K., Kim, H., Mills, G. M., Trevino, V., and Verhaak, R. G. (2015). Comparison of  
679 gene expression patterns across 12 tumor types identifies a cancer supercluster characterized by TP53  
680 mutations and cell cycle defects. *Oncogene* *34*, 2732-2740.

681 Mazor, T., Pankov, A., Johnson, B. E., Hong, C., Hamilton, E. G., Bell, R. J., Smirnov, I. V., Reis, G. F.,  
682 Phillips, J. J., Barnes, M. J., *et al.* (2015). DNA Methylation and Somatic Mutations Converge on the Cell  
683 Cycle and Define Similar Evolutionary Histories in Brain Tumors. *Cancer Cell* *28*, 307-317.

684 Meng, Y., Beckett, M. A., Liang, H., Mauceri, H. J., van Rooijen, N., Cohen, K. S., and Weichselbaum, R. R.  
685 (2010). Blockade of tumor necrosis factor alpha signaling in tumor-associated macrophages as a  
686 radiosensitizing strategy. *Cancer research* *70*, 1534-1543.

687 Newman, A. M., Liu, C. L., Green, M. R., Gentles, A. J., Feng, W., Xu, Y., Hoang, C. D., Diehn, M., and  
688 Alizadeh, A. A. (2015). Robust enumeration of cell subsets from tissue expression profiles. *Nat Methods*  
689 *12*, 453-457.

690 Noushmehr, H., Weisenberger, D. J., Diefes, K., Phillips, H. S., Pujara, K., Berman, B. P., Pan, F., Pelloski, C.  
691 E., Sulman, E. P., Bhat, K. P., *et al.* (2010). Identification of a CpG island methylator phenotype that  
692 defines a distinct subgroup of glioma. *Cancer Cell* *17*, 510-522.

693 Olar, A., and Aldape, K. D. (2014). Using the molecular classification of glioblastoma to inform  
694 personalized treatment. *The Journal of pathology* *232*, 165-177.

695 Ozawa, T., Riester, M., Cheng, Y., Huse, J. T., Squatrito, M., Helmy, K., Charles, N., Michor, F., and  
696 Holland, E. C. (2014). Most human non-GCIMP glioblastoma subtypes evolve from a common proneural-  
697 like precursor glioma. *Cancer Cell* *26*, 288-300.

698 Palucka, K., and Banchereau, J. (2012). Cancer immunotherapy via dendritic cells. *Nature reviews Cancer*  
699 *12*, 265-277.

700 Patel, A. P., Tirosh, I., Trombetta, J. J., Shalek, A. K., Gillespie, S. M., Wakimoto, H., Cahill, D. P., Nahed, B.  
701 V., Curry, W. T., Martuza, R. L., *et al.* (2014). Single-cell RNA-seq highlights intratumoral heterogeneity in  
702 primary glioblastoma. *Science* *344*, 1396-1401.

703 Phillips, H. S., Kharbanda, S., Chen, R., Forrest, W. F., Soriano, R. H., Wu, T. D., Misra, A., Nigro, J. M.,  
704 Colman, H., Soroceanu, L., *et al.* (2006). Molecular subclasses of high-grade glioma predict prognosis,  
705 delineate a pattern of disease progression, and resemble stages in neurogenesis. *Cancer Cell* *9*, 157-173.

706 Prins, R. M., Soto, H., Konkankit, V., Odesa, S. K., Eskin, A., Yong, W. H., Nelson, S. F., and Liau, L. M.  
707 (2011). Gene expression profile correlates with T-cell infiltration and relative survival in glioblastoma  
708 patients vaccinated with dendritic cell immunotherapy. *Clin Cancer Res* *17*, 1603-1615.

709 Pyonteck, S. M., Akkari, L., Schuhmacher, A. J., Bowman, R. L., Sevenich, L., Quail, D. F., Olson, O. C.,  
710 Quick, M. L., Huse, J. T., Teijeiro, V., *et al.* (2013). CSF-1R inhibition alters macrophage polarization and  
711 blocks glioma progression. *Nat Med* *19*, 1264-1272.

712 Ries, C. H., Cannarile, M. A., Hoves, S., Benz, J., Wartha, K., Runza, V., Rey-Giraud, F., Pradel, L. P.,  
713 Feuerhake, F., Klaman, I., *et al.* (2014). Targeting tumor-associated macrophages with anti-CSF-1R  
714 antibody reveals a strategy for cancer therapy. *Cancer Cell* *25*, 846-859.

715 Ruffell, B., and Coussens, L. M. (2015). Macrophages and therapeutic resistance in cancer. *Cancer cell* *27*,  
716 462-472.

717 Sandberg, R., and Larsson, O. (2007). Improved precision and accuracy for microarrays using updated  
718 probe set definitions. *BMC Bioinformatics* *8*, 48.

719 Schumacher, T. N., and Schreiber, R. D. (2015). Neoantigens in cancer immunotherapy. *Science* *348*, 69-  
720 74.

721 Sturm, D., Bender, S., Jones, D. T., Lichter, P., Grill, J., Becher, O., Hawkins, C., Majewski, J., Jones, C.,  
722 Costello, J. F., *et al.* (2014). Paediatric and adult glioblastoma: multiform (epi)genomic culprits emerge.  
723 *Nat Rev Cancer* *14*, 92-107.

724 Sturm, D., Witt, H., Hovestadt, V., Khuong-Quang, D. A., Jones, D. T., Konermann, C., Pfaff, E., Tonjes, M.,  
725 Sill, M., Bender, S., *et al.* (2012). Hotspot mutations in H3F3A and IDH1 define distinct epigenetic and  
726 biological subgroups of glioblastoma. *Cancer Cell* *22*, 425-437.

727 Torres-Garcia, W., Zheng, S., Sivachenko, A., Vegesna, R., Wang, Q., Yao, R., Berger, M. F., Weinstein, J.  
728 N., Getz, G., and Verhaak, R. G. (2014). PRADA: pipeline for RNA sequencing data analysis. *Bioinformatics*  
729 *30*, 2224-2226.

730 Verhaak, C. M., Lintsen, A. M., Evers, A. W., and Braat, D. D. (2010a). Who is at risk of emotional  
731 problems and how do you know? Screening of women going for IVF treatment. *Hum Reprod* *25*, 1234-  
732 1240.

733 Verhaak, R. G., Hoadley, K. A., Purdom, E., Wang, V., Qi, Y., Wilkerson, M. D., Miller, C. R., Ding, L., Golub,  
734 T., Mesirov, J. P., *et al.* (2010b). Integrated genomic analysis identifies clinically relevant subtypes of  
735 glioblastoma characterized by abnormalities in PDGFRA, IDH1, EGFR, and NF1. *Cancer Cell* *17*, 98-110.

736 Verhaak, R. G., Tamayo, P., Yang, J. Y., Hubbard, D., Zhang, H., Creighton, C. J., Fereday, S., Lawrence, M.,  
737 Carter, S. L., Mermel, C. H., *et al.* (2013). Prognostically relevant gene signatures of high-grade serous  
738 ovarian carcinoma. *J Clin Invest* *123*, 517-525.

739 Yan, J., Kong, L. Y., Hu, J., Gabrusiewicz, K., Dibra, D., Xia, X., Heimerger, A. B., and Li, S. (2015). FGL2 as  
740 a Multimodality Regulator of Tumor-Mediated Immune Suppression and Therapeutic Target in Gliomas.  
741 *J Natl Cancer Inst* *107*.

742 Ye, X. Z., Xu, S. L., Xin, Y. H., Yu, S. C., Ping, Y. F., Chen, L., Xiao, H. L., Wang, B., Yi, L., Wang, Q. L., *et al.*  
743 (2012). Tumor-associated microglia/macrophages enhance the invasion of glioma stem-like cells via TGF-  
744 beta1 signaling pathway. *J Immunol* *189*, 444-453.

745 Yoshihara, K., Shahmoradgoli, M., Martinez, E., Vegesna, R., Kim, H., Torres-Garcia, W., Trevino, V., Shen,  
746 H., Laird, P. W., Levine, D. A., *et al.* (2013). Inferring tumour purity and stromal and immune cell  
747 admixture from expression data. *Nat Commun* *4*, 2612.

748 Zeng, J., See, A. P., Phallen, J., Jackson, C. M., Belcaid, Z., Ruzevick, J., Durham, N., Meyer, C., Harris, T. J.,  
749 Albesiano, E., *et al.* (2013). Anti-PD-1 blockade and stereotactic radiation produce long-term survival in  
750 mice with intracranial gliomas. *Int J Radiat Oncol Biol Phys* *86*, 343-349.

751 Zheng, S., Chheda, M. G., and Verhaak, R. G. (2012). Studying a complex tumor: potential and pitfalls.  
752 *Cancer J* *18*, 107-114.

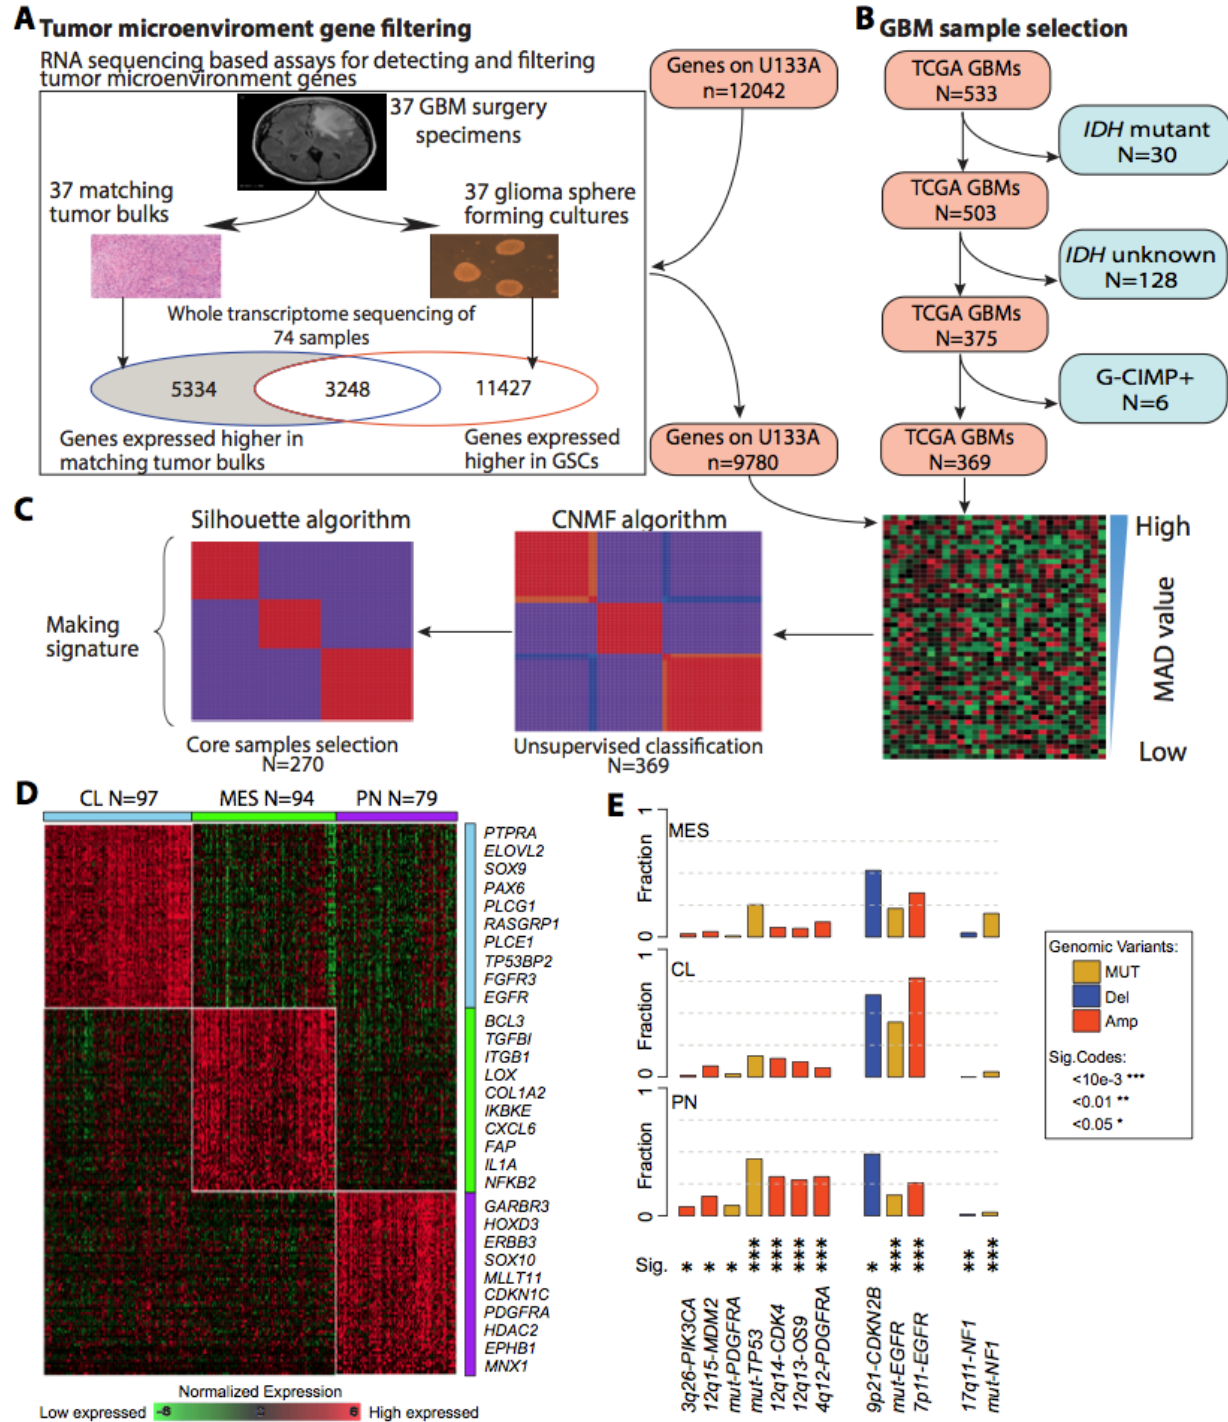

753

754 **Figure 1. Molecular classification of IDHwt GBMs.** (A) Filtering tumor associated  
 755 microenvironment genes. (B) Discarding IDH mutation related GBMs. (C) Overview of NMF  
 756 clustering. (D) Heatmap of 70-gene signatures by gene expression subtype were developed  
 757 based on 270 GBMs. Top ten genes are shown for each subtype. (E) Frequency of subtype  
 758 related somatic genomic alterations. Chi-square test was used to calculate the distribution  
 759 difference among three subtypes per genomic variant.  
 760



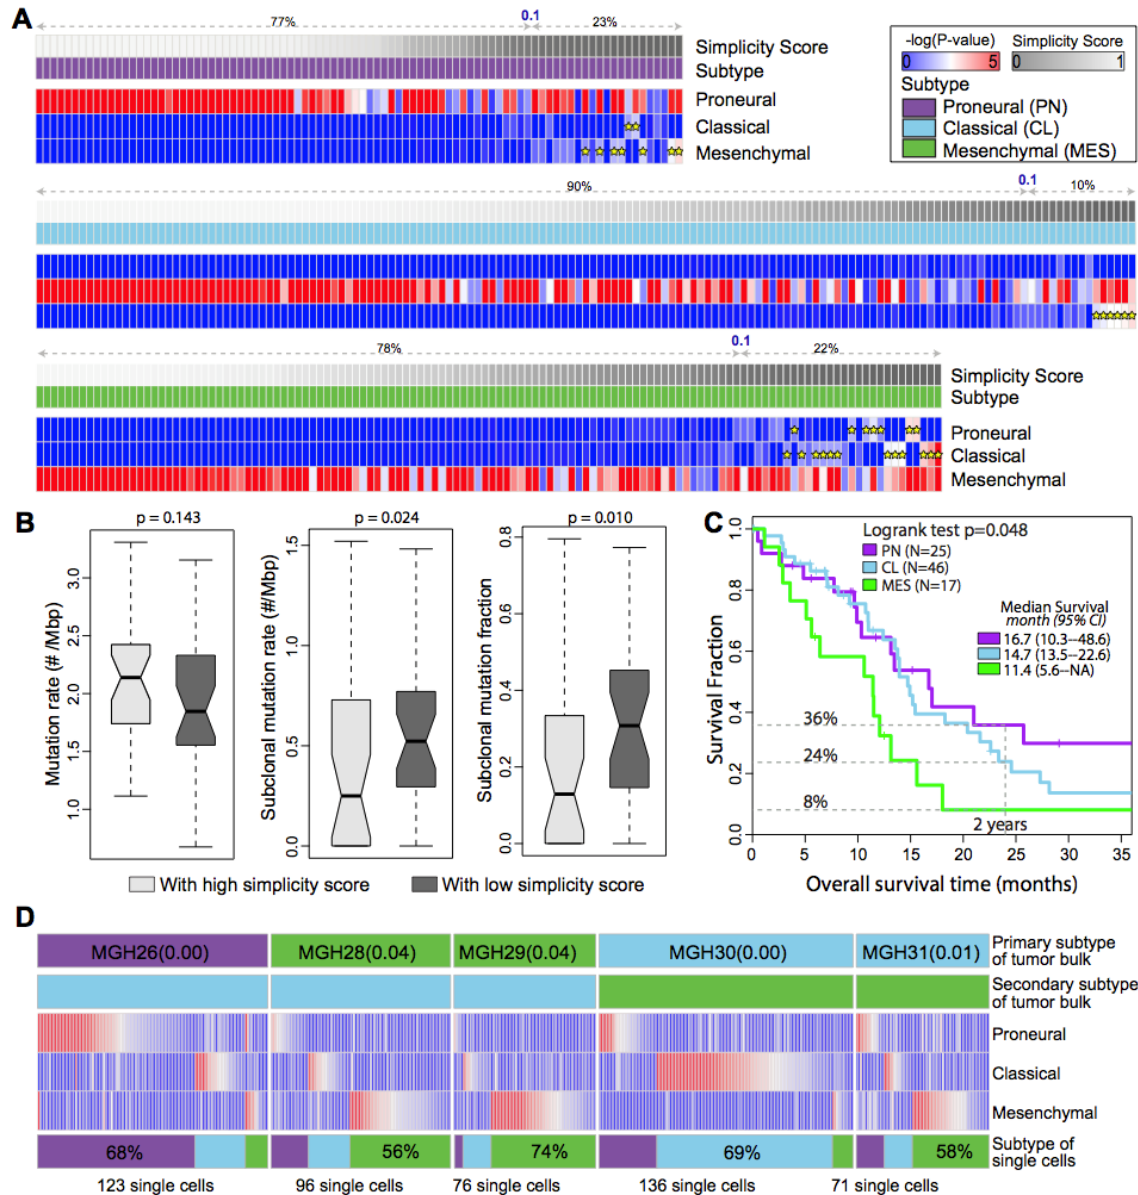

761  
762 **Figure 2. Multi activation of transcriptional subtypes associated with intratumoral**  
763 **heterogeneity.** (A) The expression profiles of 369 IDHwt GBMs were analyzed using Affymetrix  
764 U133A. The empirical  $-\log(\text{empirical P-value})$  of raw ssGSEA enrichment scores at each  
765 signature are shown as heatmaps, with dark blue representing no activation and bright red as  
766 highly activated. Yellow star indicates the secondary activated subtype (empirical  $p\text{-value} < 0.05$ ).  
767 For each panel, the first row shows simplicity score, and the second row indicates  
768 transcriptional subtype. (B) Comparison of mutation rate, subclonal mutation rate and subclonal  
769 mutation fraction between IDHwt GBMs with high and low simplicity scores. P-values were  
770 calculated using Wilcoxon rank test and shown at the top of each panel. (C) Kaplan-Meier  
771 survival curve by subtype. (D) Transcriptome classification of five bulk tumor samples and 502  
772 single GBM cells derived from them. The top two row of each panel show the dominant and  
773 secondary subtype of the GBM tumor bulk. The heatmap of each panel shows the empirical  
774  $-\log(P\text{-value})$  of the ssGSEA scores of the derived single GBM cells on each of the three  
775 subtype signatures. The bottom row shows the subtype distribution of derived single GBM cells  
776 within the same GBM tumor of origin.



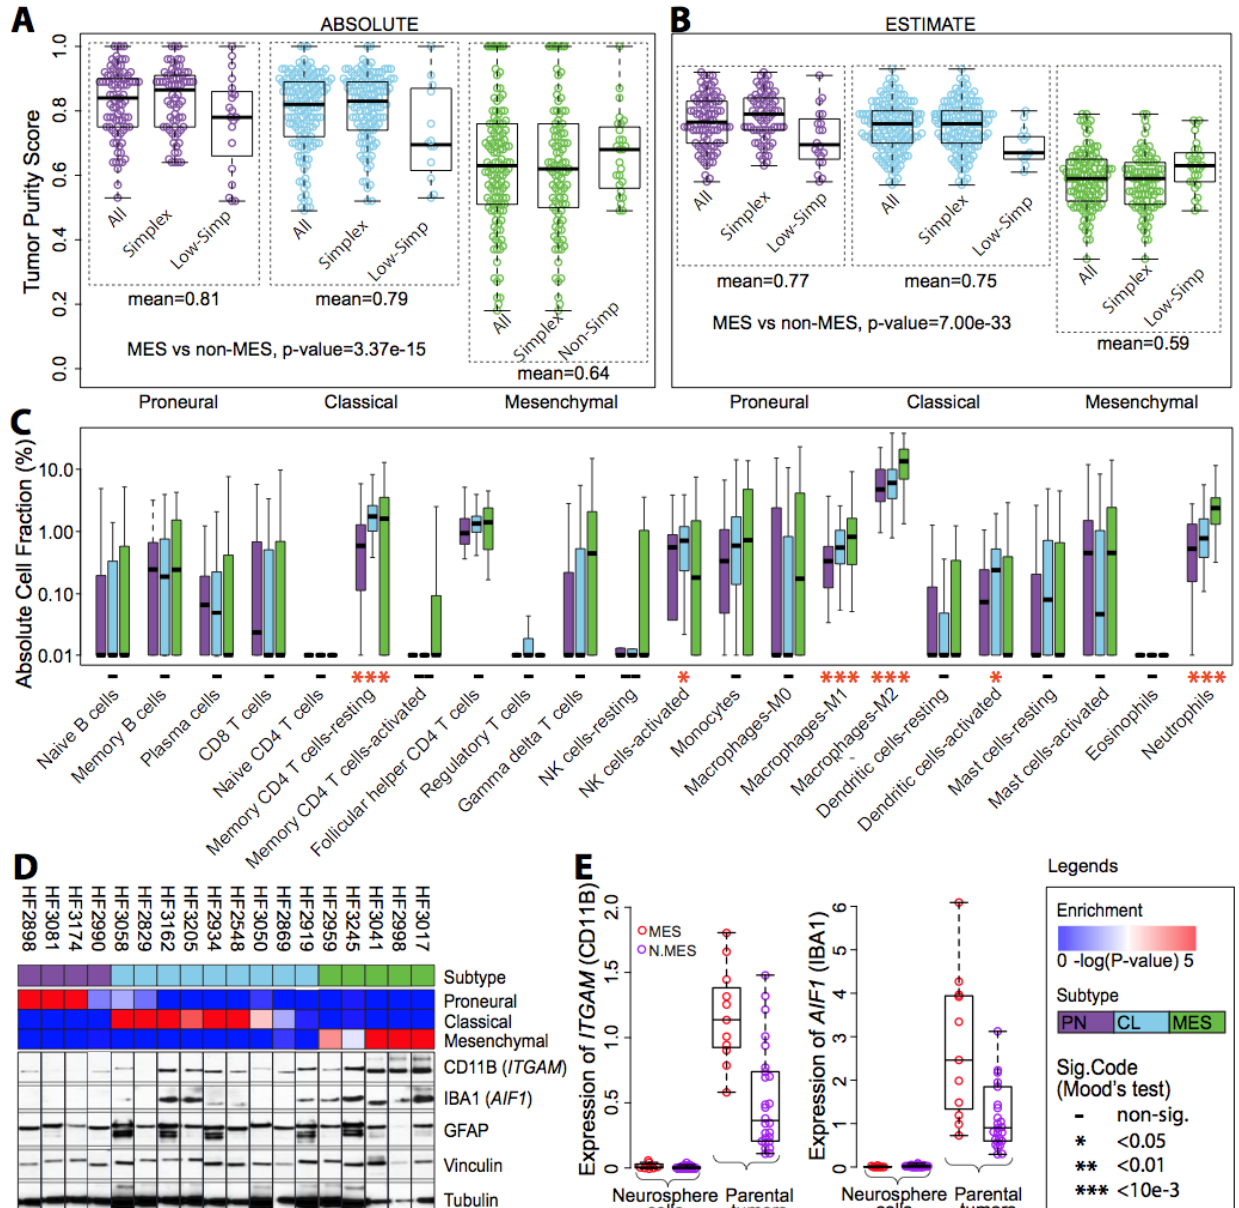

777  
778 **Figure 3. Transcriptional subtypes differentially activate the immune microenvironment.**

779 (A, B) Tumor purity of 364 respectively 369 TCGA IDHwt GBM samples was determined by  
780 ABSOLUTE and ESTIMATE. The difference in tumor purity between subtypes was evaluated  
781 using a two-sample heteroscedastic t-test. (C) Comparison of immune cell fractions among  
782 subtypes. Immune cell fractions were estimated using CIBERSORT and corrected using  
783 ABSOLUTE purity scores per sample. The distribution of immune cell fractions of 69 PN, 137  
784 CL and 96 MES IDHwt GBMs with simplicity score>0.1 were shown by purple, skyblue and  
785 green boxplots, respectively. Median value difference of cell fraction among subtypes was  
786 evaluated using Mood's test. (D) The upper panel shows ssGSEA enrichment scores and  
787 associated expression subtype classifications. Bottom panels display protein expression of the  
788 microglial markers integrin alpha M (*ITGAM*) and allograft inflammatory factor 1 (*IBA1*),  
789 astrocyte marker glial fibrillary acidic protein (*GFAP*) and the loading control tubulin. (E)  
790 Comparison of *ITGAM* and *IBA1* gene expression levels between GBM and derived  
791 neurosphere models.

792

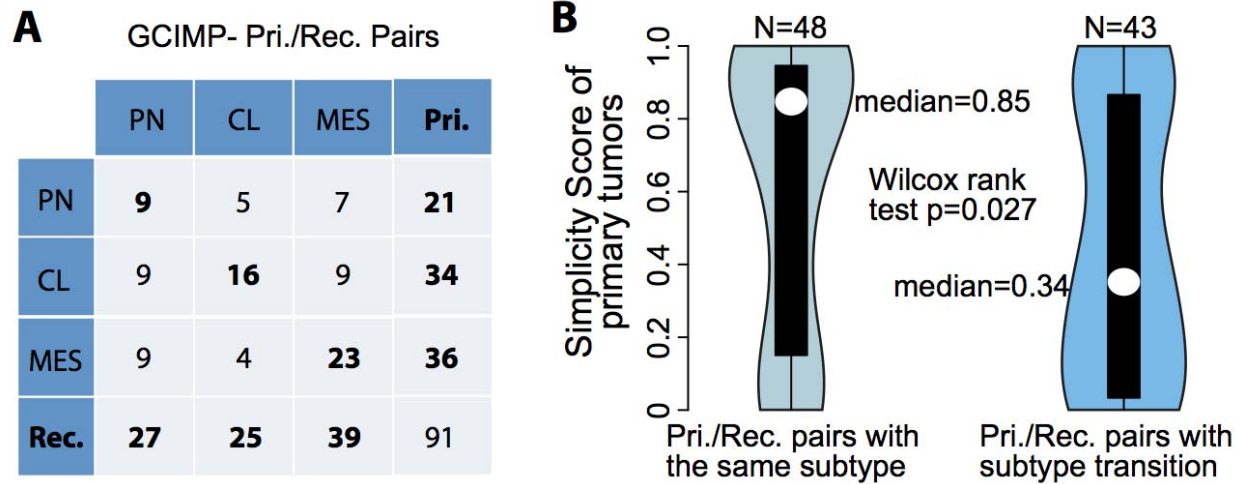

793  
794  
795  
796  
797  
798

**Figure 4. Comparison between transcriptional subtype of primary and paired recurrent tumors.** (A) Rows and columns of the cross table represents subtype distribution frequency of primary and paired recurrent tumors, respectively. (B) Violin plots show the distribution of simplicity scores of pairs with (left) and without (right) subtype transition.

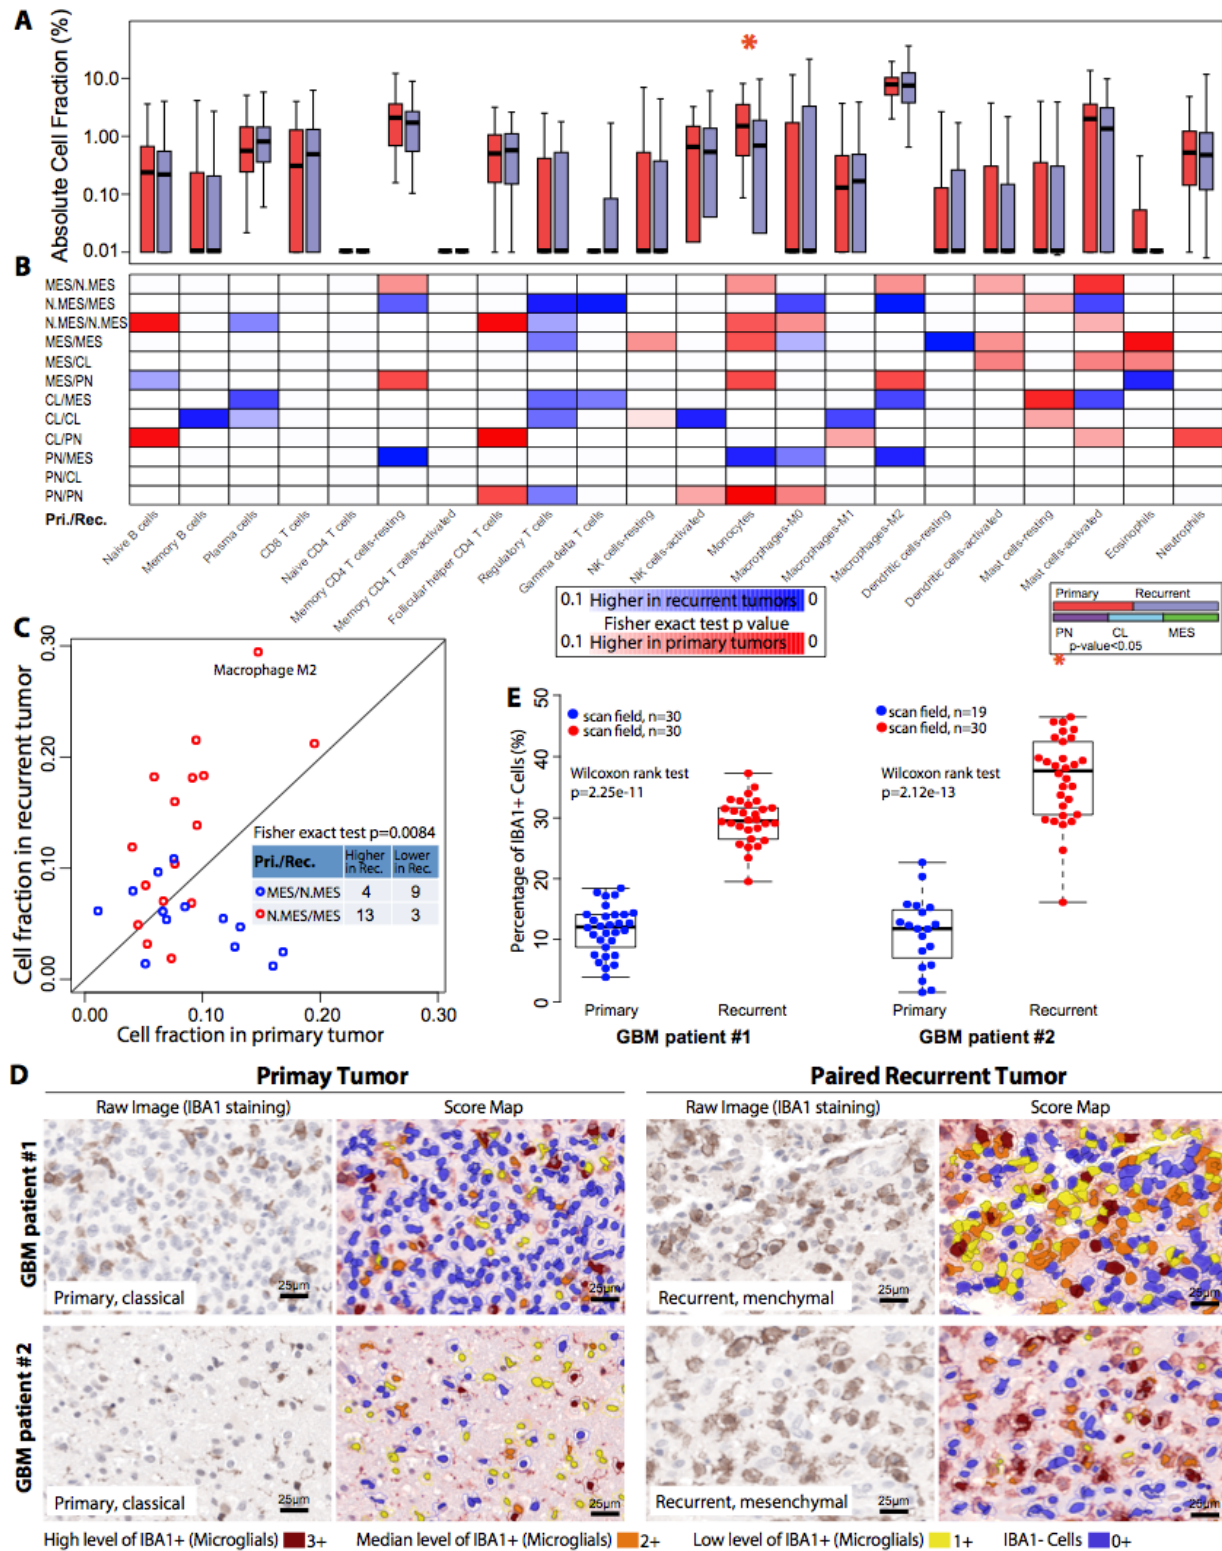

799 **Figure 5. Microenvironment transition between 91 primary and paired recurrent IDH wild**  
 800 **type GBM.** (A) Red and blue boxplots represent the immune cell fraction distribution of each  
 801 **type GBM.** (A) Red and blue boxplots represent the immune cell fraction distribution of each  
 802 immune cell type. Immune cell fraction was calculated using CIBERSORT and adjusted using  
 803 ESTIMATE purity scores. Difference between cell fraction of primary and paired recurrent  
 804 tumors was calculated using Wilcoxon rank test. (B) The blue-to-red heatmap represents

805 immune cell fraction changes upon tumor recurrence per subtype transitions which were list on  
806 the left of the heatmap. Fisher exact test was used to evaluate the distribution difference  
807 between patients with higher/lower immune cell fractions at tumor recurrence per subtype  
808 transition. **(C)** Each dot represents a pair of primary and recurrent GBM with axes indicating M2  
809 macrophage cell fraction. **(D)** Representative images of IBA1 immunohistochemical staining and  
810 corresponding score map obtained by InForm image analysis in two matched pairs of primary  
811 and recurrent GBM. Scale bar, 25  $\mu$ m. **(E)** Unbiased quantification of IBA1+ percentage in  
812 primary and recurrent GBMs.  
813

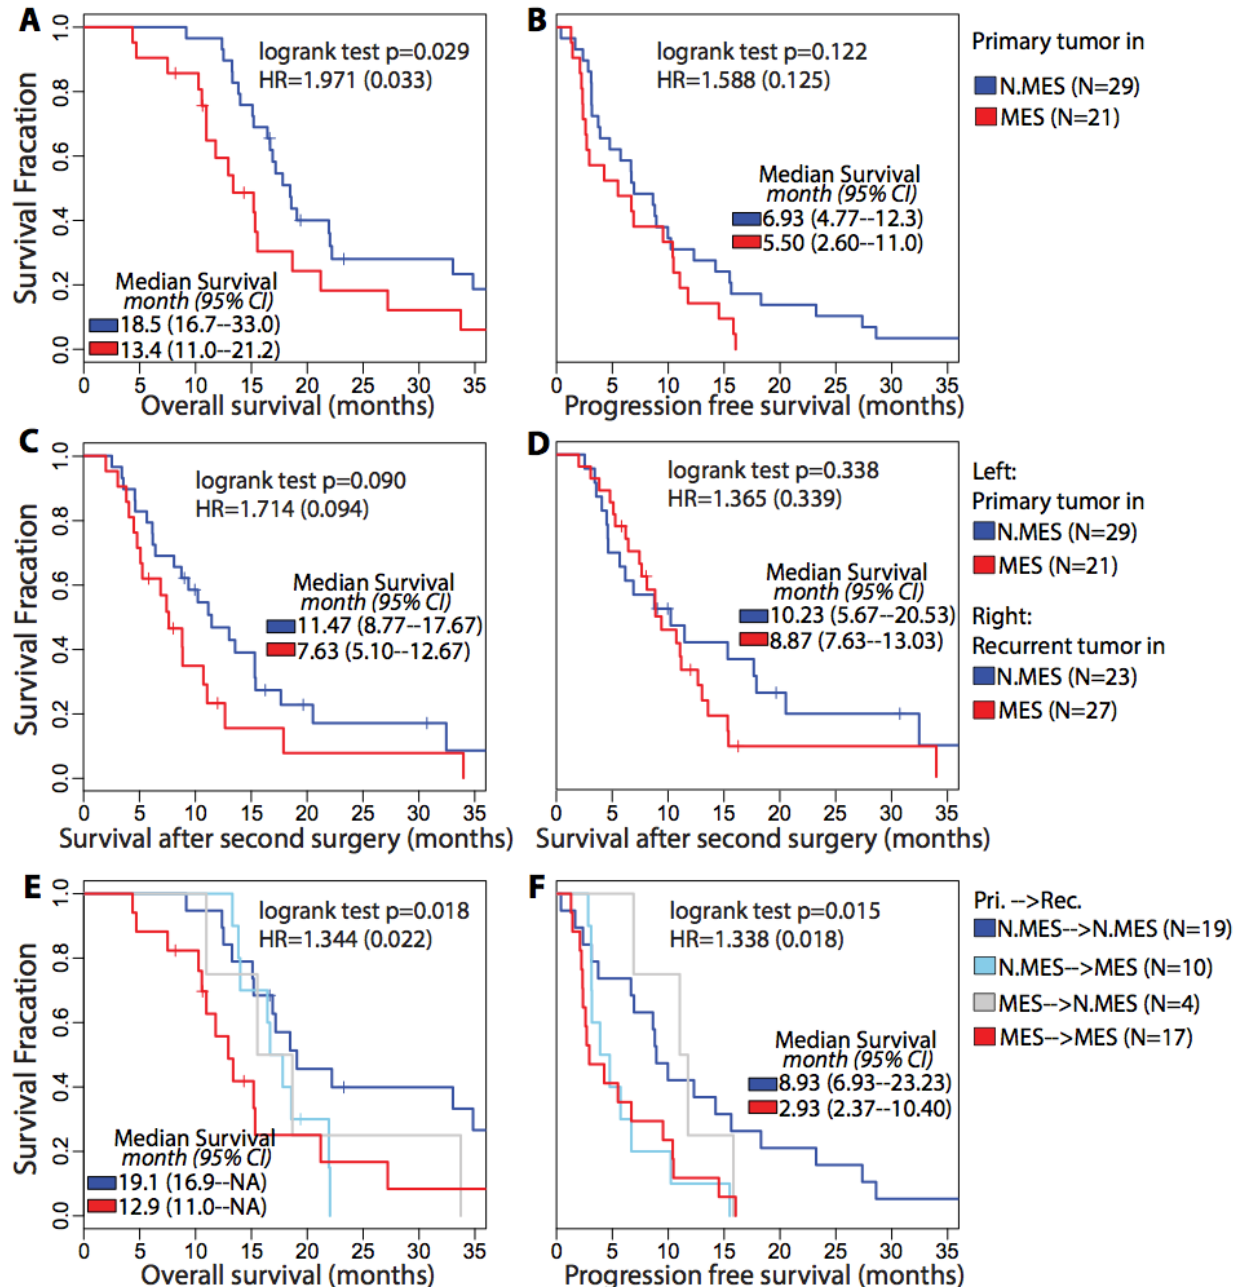

814  
815  
816  
817  
818  
819  
820

**Figure 6. Survival analysis of paired IDH wild type GBM.** (A, B) OS and PFS analyses between samples with different primary subtype. (C) Difference of survival time after secondary surgery between patients with non-MES and MES in primary tumors. (D) Survival analysis of time after secondary surgery between patients with non-MES and MES in recurrent tumors. (E, F) OS and PFS analyses between samples with difference recurrent subtype.



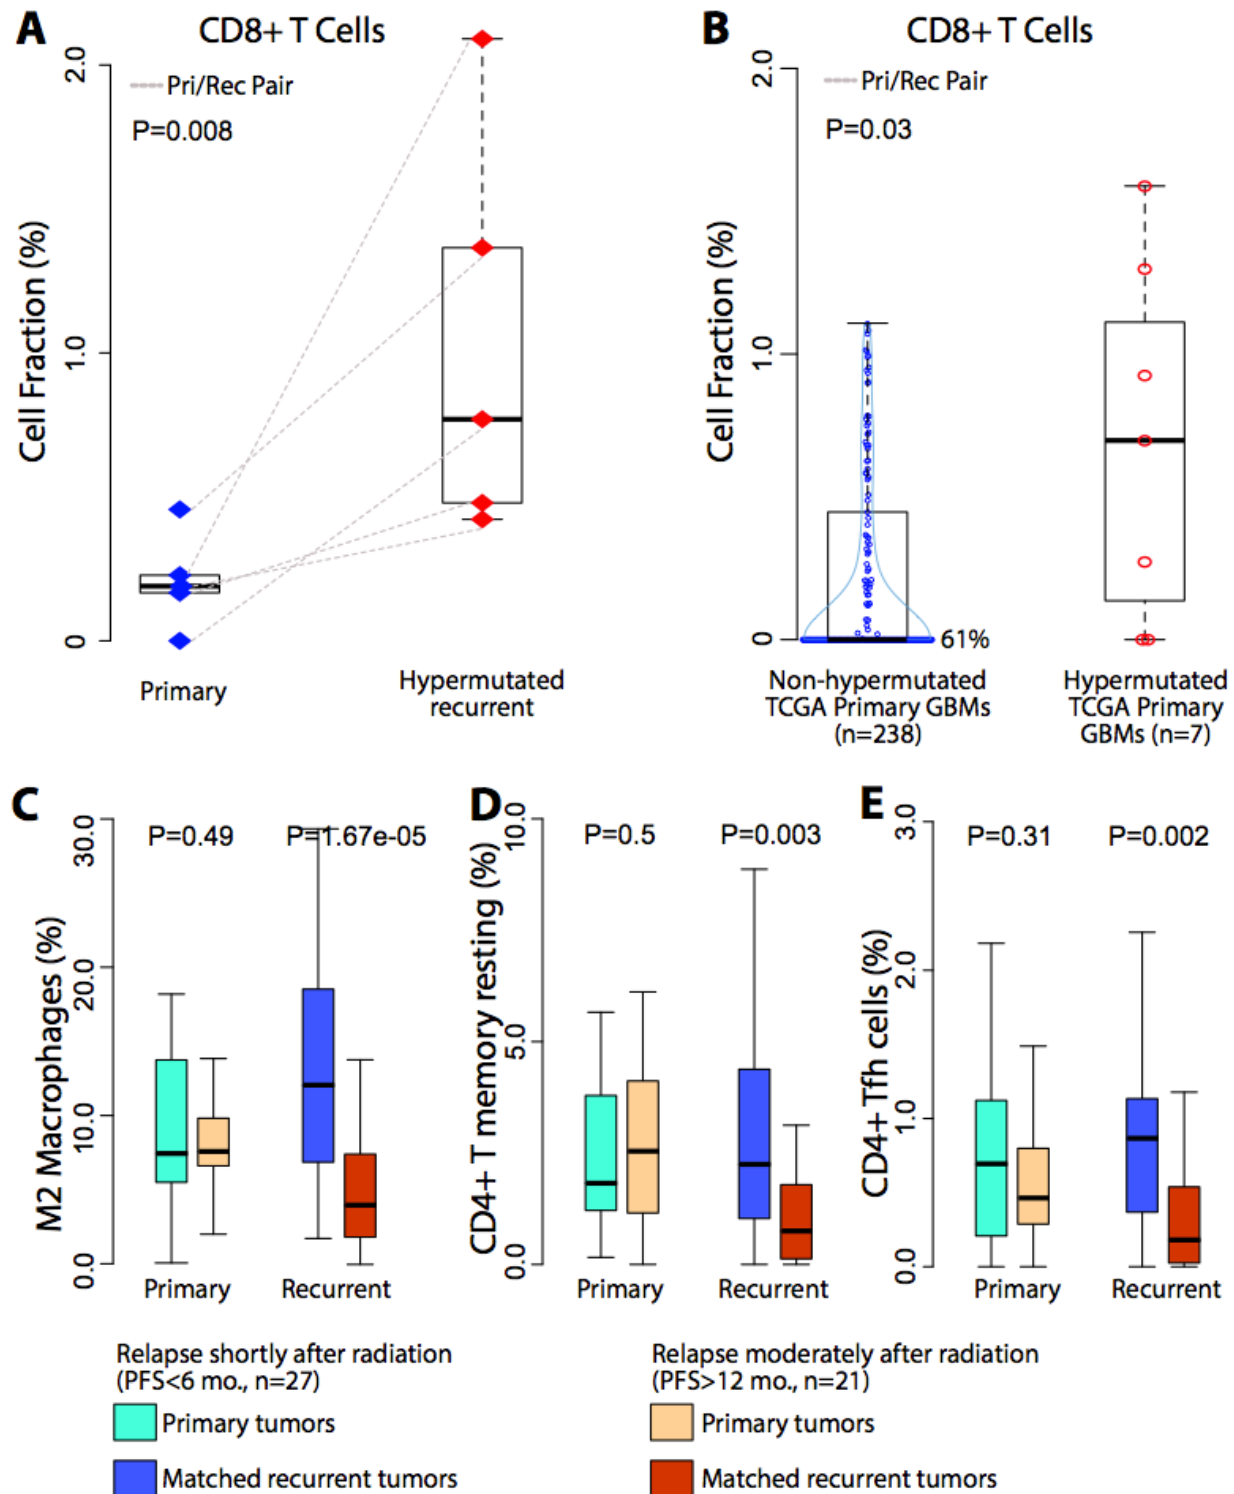

821

822 **Figure 7. Immune cell frequency comparison.** (A). Blue and red diamond indicate individual  
 823 primary and recurrent tumors. Dash line connects paired primary and recurrent tumors. (B).  
 824 Blue and red cycle indicate non-hypermutated and hypermutated primary samples. (C-E). Sky  
 825 blue/dark blue and orange/red boxplots indicate short- and long- term relapsed tumors,

826 respectively. Wilcoxon rank tests were used to examine the significance of the differences  
827 between groups.  
828

829

## Supplementary Information

### 830 Supplementary Figures and Legends

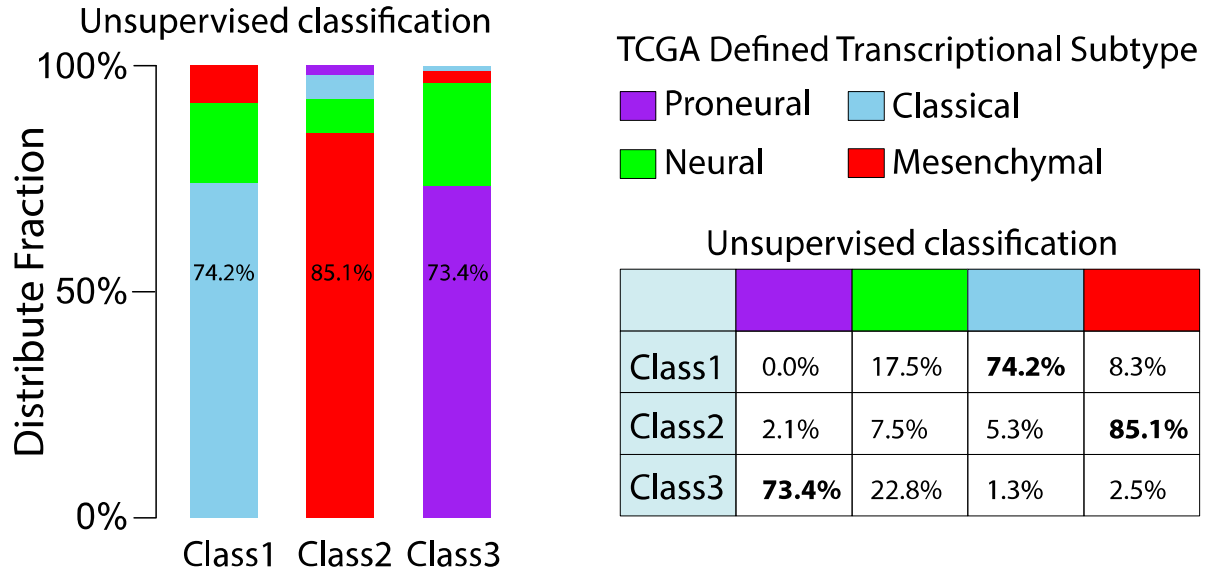

831

832 **Figure S1.** Comparison between GCIMP- GBM specific classification and TCGA defined GBM  
 833 subtypes. 270 samples were identified as core samples with positive silhouette width core  
 834 samples. 97, 94 and 79 samples were unsupervised classified class1, class2 and class3,  
 835 respectively. The previous four transcriptional subtypes of these 270 samples were determined  
 836 by TCGA Research Network (Brennan et al., 2013).  
 837



838

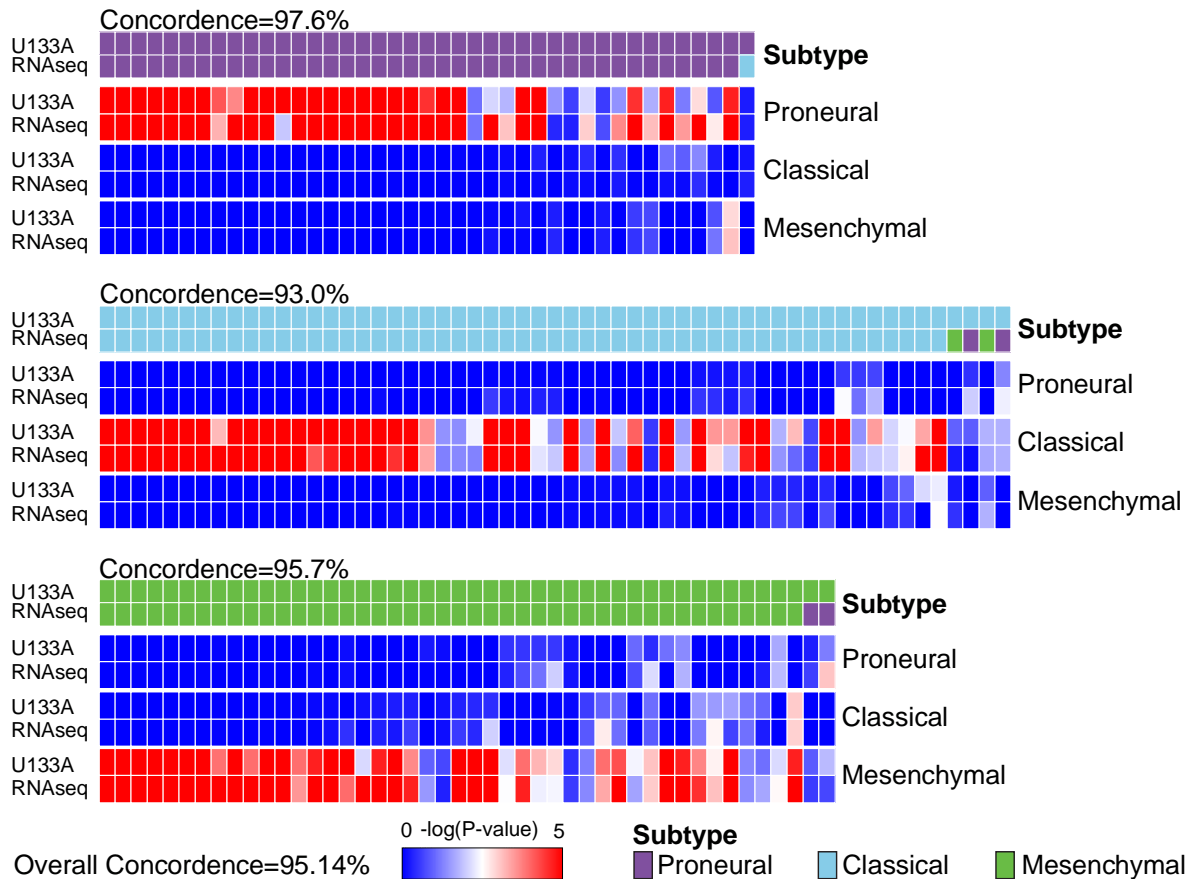

839

840 **Figure S2. Concordance of transcriptional classification of GBMs crosses multiple**  
841 **platforms.** Through TCGA, the expression profiles of 144 GBM were analyzed using both  
842 Affymetrix U133A gene expression arrays and RNA sequencing. The empirical  $-\log(P\text{-value})$  of  
843 raw ssGSEA enrichment scores at each signature are shown as heatmaps, with dark blue  
844 representing no activation and bright red as highly activated. For each panel, the first row shows  
845 U133A based classification, and the second row indicates RNA-seq subtype classification.  
846

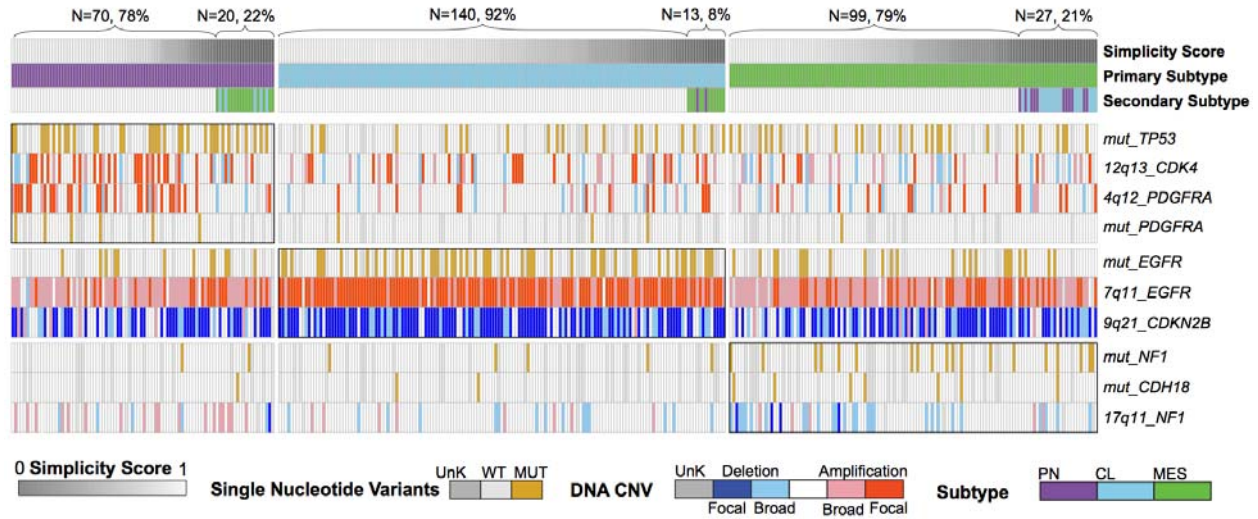

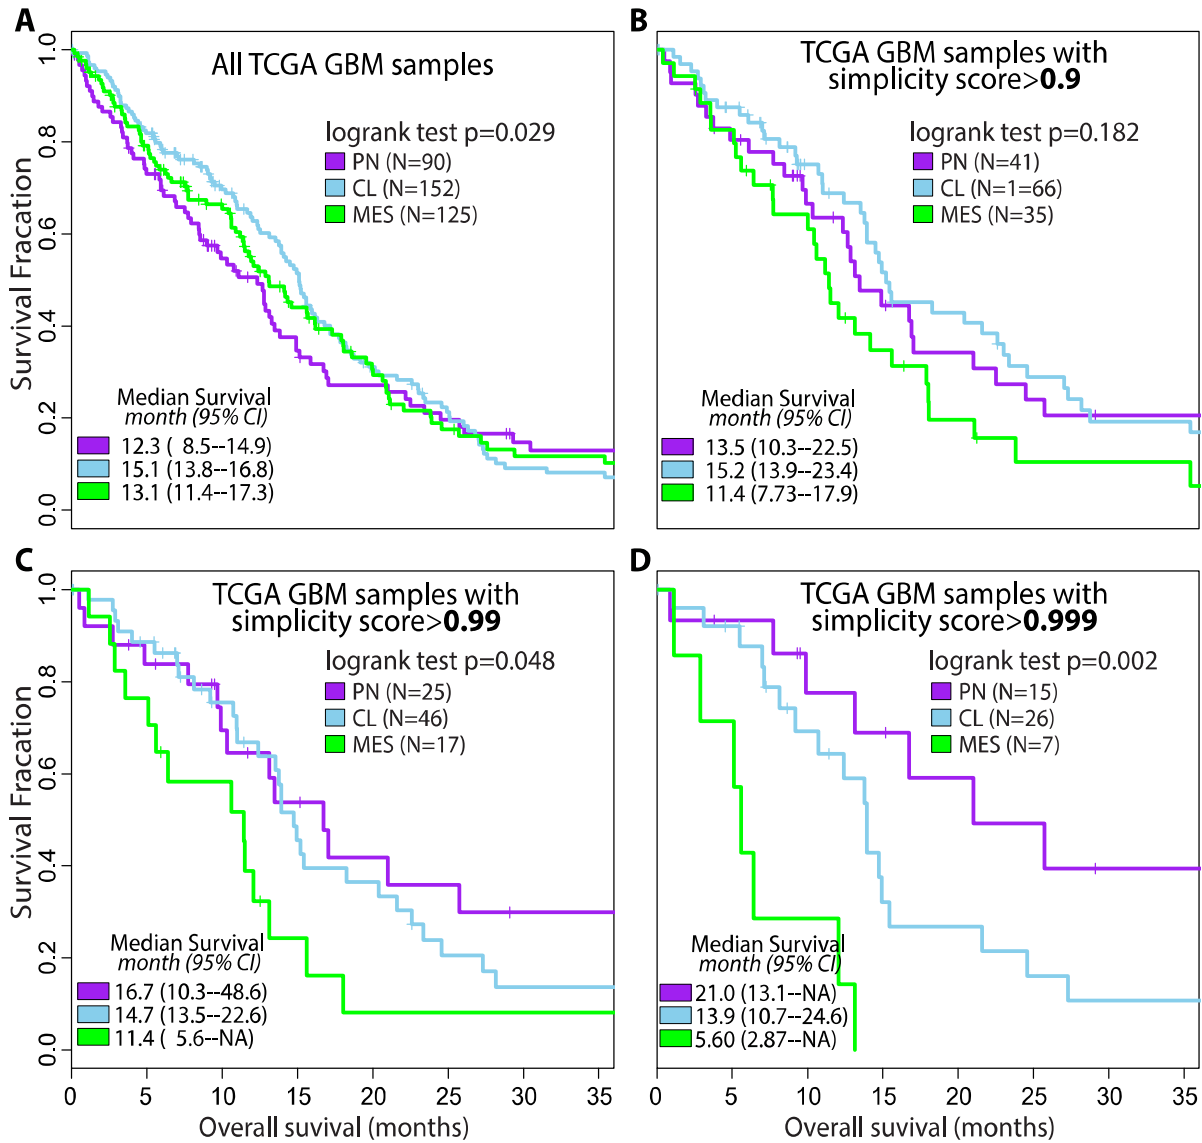

853

854 **Figure S4. Patient survival differences between transcriptional subtypes.** Samples were  
 855 filtered using increased simplicity score as threshold from panel A to D.

856

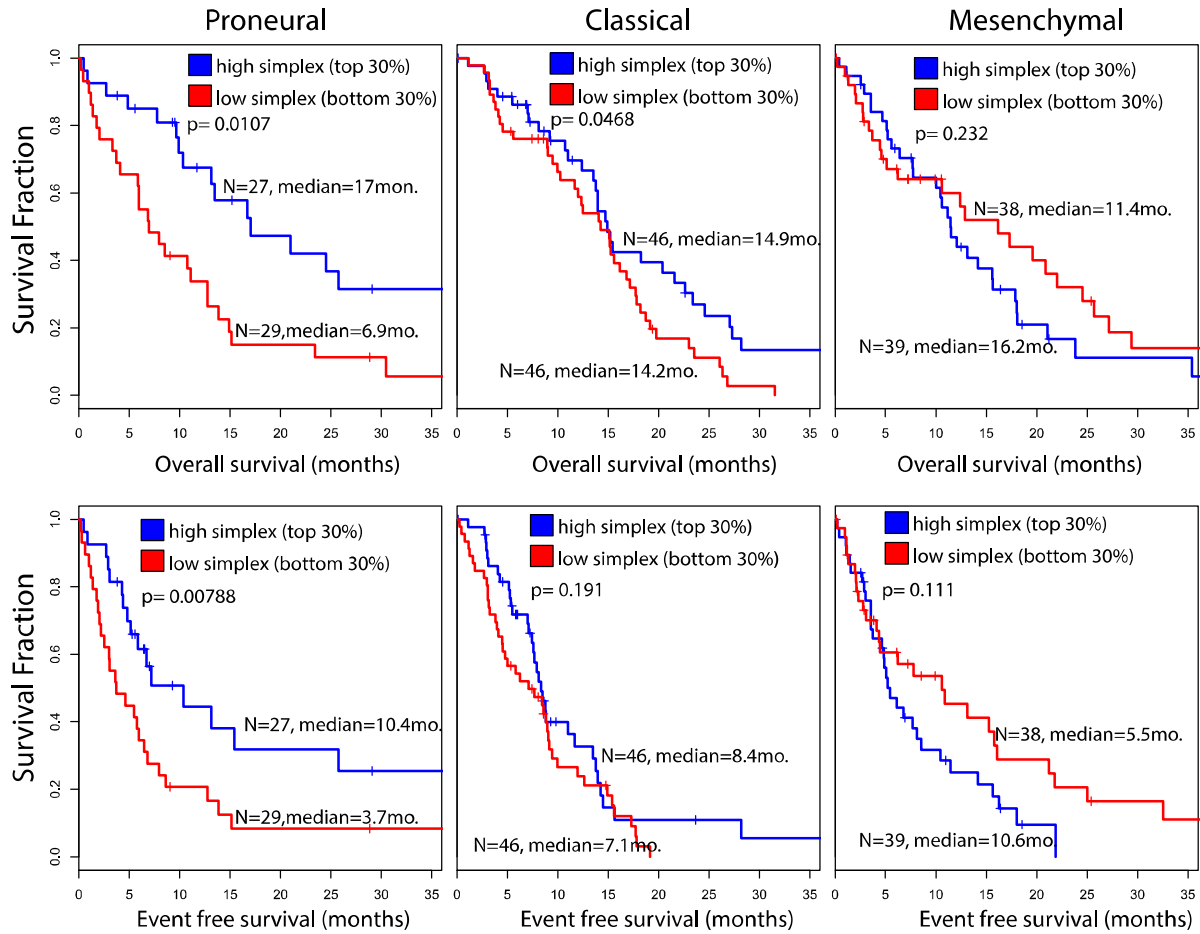

857

858 **Figure S5.** Overall and event free survival analysis comparison between samples with high and  
859 low simplicity scores in each subtype.

860

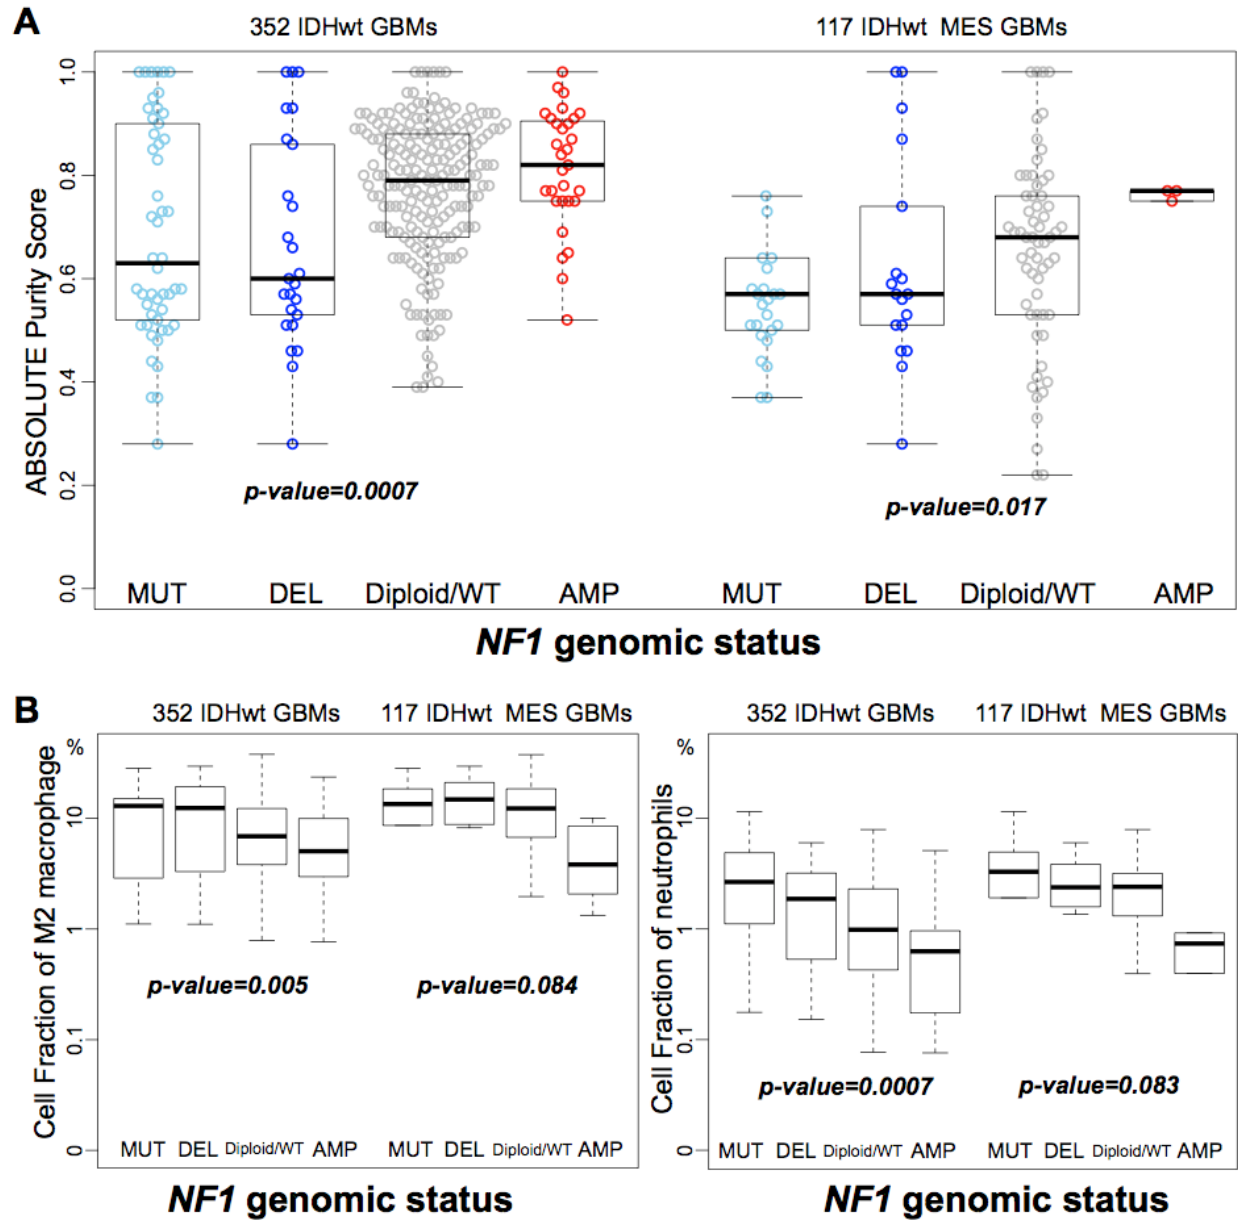

861  
862  
863  
864  
865  
866

**Figure S6. Comparison of tumor purity and immune cell fraction between GBMs with different *NF1* genomic status.** P-values were calculated using Wilcoxon rank test between samples carrying *NF1* deletion/mutation and others.



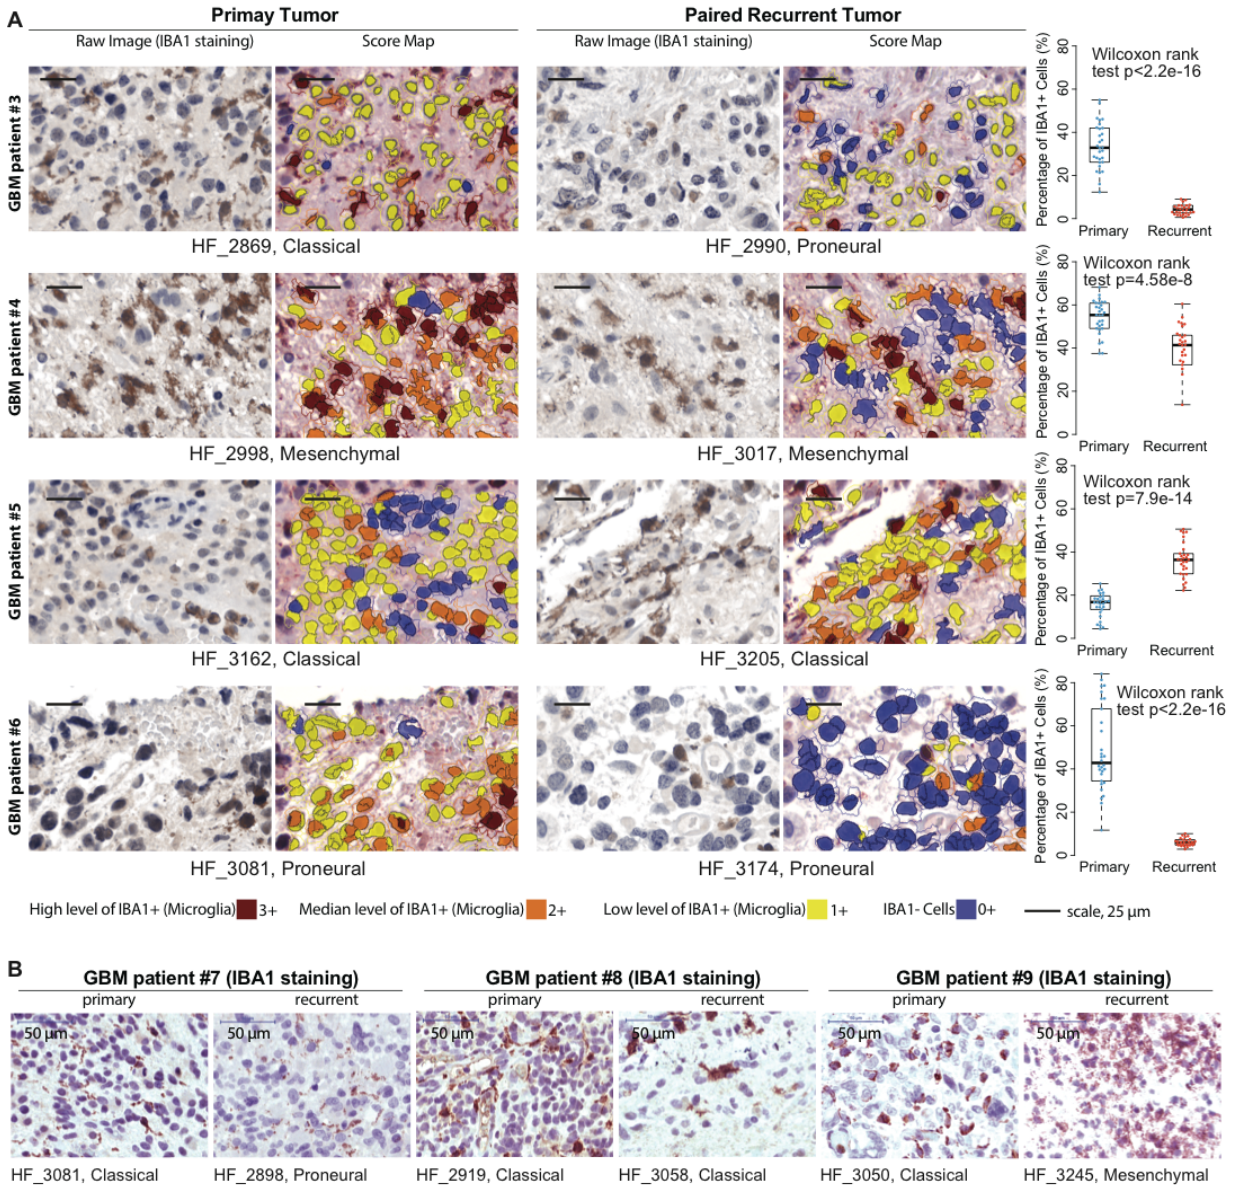

867

868

869

870

871

872

873

874

**Figure S7.** Immunohistochemistry staining of the IBA1 microglia marker. **(A)** Representative images with immunohistochemical staining of the IBA1 and score map obtained by InForm image analysis tools in four matched pairs of primary and recurrent GBM. Thirty scan fields were unbiased selected for each tumor by Caliper Vectra pathology imaging system automatically. **(B)** IHC staining of the IBA1 in three additional matched pairs of primary and recurrent GBM.

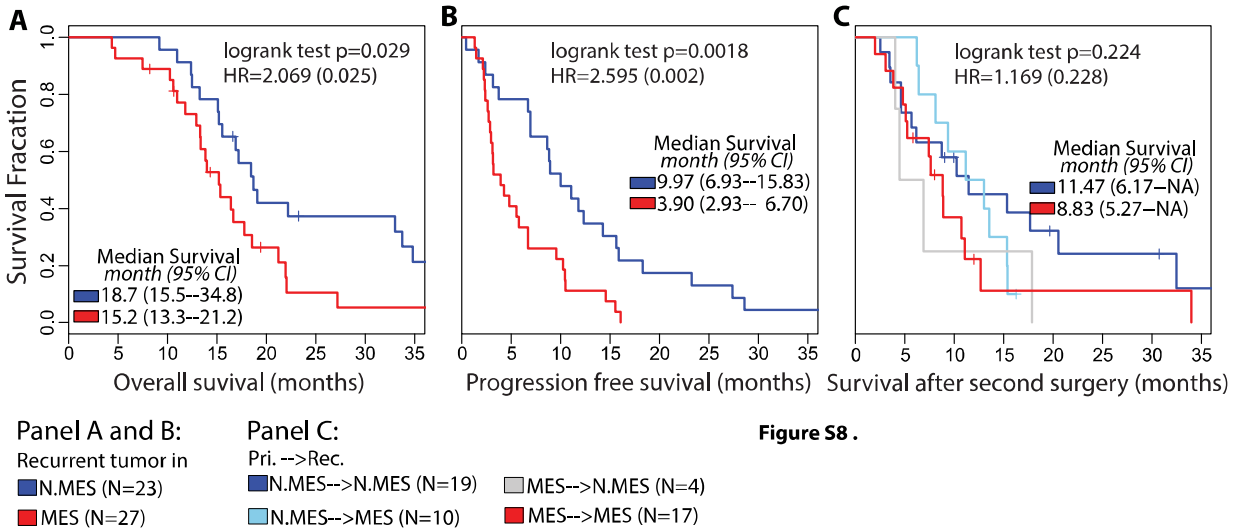

875

876 **Figure S8. (A, B)** Overall and progression free survival analysis between samples in different  
 877 recurrent subtypes. **(C)** Survival after secondary surgery comparison between different  
 878 transition types.
